# Supplementary material for: Gain-of-function mutations in the UNC-2/CaV2α channel lead to excitation-dominant synaptic transmission in Caenorhabditis elegans
Source: eLife journal article supplement (doi:10.7554/elife.45905), 2019-07-31
Supplement: supp [file elife-45905-supp-v1.zip]

Figure 2-figure supplement 1
