# Supplementary material for: Gain-of-function mutations in the UNC-2/CaV2α channel lead to excitation-dominant synaptic transmission in Caenorhabditis elegans
Source: eLife journal article supplement (doi:10.7554/elife.45905), 2019-07-31
Supplement: supp [file elife-45905-supp-v2.zip]

Archive with 23 entries (23 files):
- elife_poa_e45905_Figure_6_figure_supplement_2.pdf
- elife_poa_e45905_Figure_7_figure_supplement_1.pdf
- elife_poa_e45905_Figure_7_figure_supplement_3_source_data_1.xlsx
- elife_poa_e45905_Figure_6_figure_supplement_2_source_data_1.xlsx
- elife_poa_e45905_Figure_1_source_data_1.xlsx
- elife_poa_e45905_Figure_3_source_data_1.xlsx
- elife_poa_e45905_Video_1.avi
- elife_poa_e45905_Figure_7_source_data_1.xlsx
- elife_poa_e45905_Figure_7_figure_supplement_2.pdf
- elife_poa_e45905_Figure_2_source_data_1.xlsx
- elife_poa_e45905_Figure_6_figure_supplement_1.pdf
- elife_poa_e45905_Figure_6_source_data_1.xlsx
- elife_poa_e45905_Figure_6_figure_supplement_4.pdf
- elife_poa_e45905_Figure_4_source_data_1.xlsx
- elife_poa_e45905_Figure_6_figure_supplement_3.pdf
- elife_poa_e45905_Figure_7_figure_supplement_2_source_data_1.xlsx
- elife_poa_e45905_Figure_7_figure_supplement_3.pdf
- elife_poa_e45905_Figure_5_source_data_1.xlsx
- elife_poa_e45905_Transparent_Reporting_File.pdf
- elife_poa_e45905_Figure_6_figure_supplement_4_source_data_1.xlsx
- elife_poa_e45905_Figure_6_figure_supplement_1_source_data_1.xlsx
- elife_poa_e45905_Figure_7_figure_supplement_1_source_data_1.xlsx
- elife_poa_e45905_Figure_2_figure_supplement_1.pdf
