# Supplementary material for: Gain-of-function mutations in the UNC-2/CaV2α channel lead to excitation-dominant synaptic transmission in Caenorhabditis elegans
Source: eLife journal article supplement (doi:10.7554/elife.45905), 2019-07-31
Supplement: supp [file elife-45905-supp-v2.zip › elife_poa_e45905_Figure_1_source_data_1.xlsx]

## Sheet: Figure 1A
wild type			zf35			zf35/+
time (sec)	velocity (wormlength/sec)		time (sec)	velocity (wormlength/sec)		time (sec)	velocity (wormlength/sec)
0.512	0.2082		0.506	0.1414		0.3	-0.3486
0.765	0.2028		0.758	0.1869		0.5	-0.3098
1.024	0.2473		1.022	0.231		1	-0.1934
1.28	0.2505		1.279	0.1438		1.4	-0.2379
1.536	0.189		1.533	0.307		1.794	-0.2901
1.792	0.192		1.793	0.2607		2.052	-0.1978
2.049	0.1925		2.046	0.0567		2.32	-0.2043
2.304	0.168		2.303	-0.3662		2.572	-0.1728
2.563	0.2082		2.557	0.0879		2.762	-0.2694
2.819	0.2261		2.753	0.4491		3.294	-0.1519
3.01	0.2056		3.011	0.2845		3.534	-0.1771
3.267	0.2497		3.263	0.2637		3.939	-0.2298
3.523	0.2305		3.522	0.0522		4.048	-0.1999
3.78	0.2352		3.773	-0.2305		4.325	-0.1982
4.037	0.2031		4.04	-0.4038		4.553	-0.2294
4.293	0.2222		4.29	-0.0867		4.809	-0.1922
4.549	0.1897		4.546	0.2618		5.009	-0.3326
4.806	0.1931		5.771	0.259		5.681	-0.1488
5.062	0.2239		6.023	0.1782		5.776	-0.2164
5.254	0.2067		6.283	0.2249		6.289	-0.2034
5.509	0.1997		6.539	0.2884		6.544	-0.1135
5.76	0.2506		6.79	-0.1095		6.795	-0.1112
6.022	0.2732		7.05	-0.1666		7.001	-0.0916
6.28	0.2		7.302	0.2699		7.25	-0.1504
6.536	0.2126		7.561	0.3132		7.527	-0.0103
6.785	0.2329		7.752	0.2959		8.04	0.2267
7.048	0.1778		8.01	0.1136		8.284	0.3002
7.304	0.2293		8.268	0.1183		8.53	0.0588
7.562	0.1062		8.527	0.1946		8.854	-0.102
9.036	0.1836		8.778	0.0394		9.056	-0.1375
9.292	0.1632		9.038	-0.0605		9.325	-0.1688
9.548	0.1833		9.297	0.2099		9.551	-0.2334
9.798	0.1465		9.553	0.1859		9.751	-0.1534
10.061	0.1594		10.06	0.1543		10.269	0.1993
10.256	0.1927		10.251	0.1301		10.522	0.3912
10.51	0.1392		10.506	0.0456		10.772	0.3186
10.765	0.1245		10.764	0.1708		11.285	0.0638
11.023	0.2066		11.027	0.2049		11.507	0.1988
11.279	0.1621		11.531	-0.2828		12.836	0.2841
11.534	0.1891		11.79	0.1616		13.083	0.4084
11.791	0.1137		12.049	0.1483		13.281	0.2756
13.008	0.0341		12.301	0.2415		13.597	0.2609
13.265	0.1064		12.502	0.0776		13.805	0.275
13.515	0.1647		12.758	0.2762		14.051	0.3571
13.775	0.0937		13.013	0.3108		14.751	-0.183
14.033	0.1082		13.267	-0.2793		15.008	-0.274
14.802	0.0358		13.521	0.2347		15.268	-0.1124
15.059	0.1013		13.783	0.107		15.527	-0.1522
15.251	0.0803		14.298	-0.4494		16.286	-0.0905
15.506	0.1521		14.51	-0.54		16.545	-0.1344
15.767	0.1418		14.81	0.0488		16.801	-0.1945
16.02	0.0947		15.064	0.2156		17.062	-0.2883
16.275	0.1267		15.255	0.1847		17.317	-0.2764
16.526	0.1295		15.507	0.1737		17.504	-0.2529
16.788	0.164		15.767	0.3472		17.823	-0.1497
17.044	0.1439		16.024	0.3753		18.013	-0.1964
17.303	0.1621		16.28	0.422		18.272	-0.1862
17.551	0.1725		16.533	0.3303		18.532	-0.1836
17.751	0.1463		16.792	0.2312		19.817	0.2459
18.005	0.1685		17.047	-0.416		20.006	0.4775
18.263	0.1975		17.304	0.1598		20.261	0.5097
18.521	0.1857		17.501	0.388		20.515	0.5219
18.776	0.1313		17.755	0.3127		20.769	0.4066
19.544	0.1489		18.011	0.1745		21.032	0.3891
19.799	0.2313		18.26	0.2093		21.286	0.3727
20.058	0.1805		18.524	0.1852		21.543	0.3243
20.313	0.1612		18.78	0.1301		21.797	-0.2396
20.506	0.1679		19.035	0.2611		22.052	-0.2552
20.762	0.1587		19.294	0.1926		22.25	-0.2164
21.017	0.1444		19.55	0.0694		22.568	0.146
21.275	0.1113		19.806	0.0637		22.76	0.2464
21.531	0.1714		20.064	-0.3501		23.018	0.3683
21.789	0.1465		20.255	-0.3998		23.27	0.4162
22.045	0.1527		20.513	-0.3436		23.531	0.3174
22.301	0.204		20.767	0.1713		23.788	0.2838
22.556	0.2033		21.027	0.3175		24.049	0.3648
22.81	0.1907		21.273	0.2931		24.304	0.2616
23.005	0.1826		21.537	-0.1908		24.558	0.3808
23.254	0.1675		21.795	-0.3866		24.812	0.3621
23.517	0.1974		22.05	-0.208		25.003	0.3304
23.776	0.2409		22.298	0.2803		25.255	0.2662
24.035	0.2363		22.5	0.4585		25.516	0.286
24.282	0.2449		22.755	0.2261		25.784	0.3529
24.545	0.2212		23.013	-0.268		26.039	0.3398
24.8	0.2186		23.271	-0.4832		26.294	0.2267
25.057	0.249		23.527	-0.1958		26.543	0.4215
25.313	0.2366		23.781	0.0911		26.8	0.3054
25.505	0.2457		24.035	0.2312		27.061	0.3164
25.762	0.253		24.294	0.2912		27.318	0.2254
26.017	0.2452		24.55	0.3602		27.513	0.3599
26.275	0.2661		24.811	0.2938		27.759	0.2369
26.531	0.2634		25.063	0.366		28.024	0.1773
26.787	0.2515		25.252	0.5118		28.274	-0.4057
27.043	0.272		25.515	0.3413		28.534	-0.5319
27.292	0.2362		25.768	0.3525		28.783	-0.4689
27.555	0.2179		26.028	0.097		29.045	-0.3559
27.813	0.2519		26.282	0.3083		29.301	-0.3094
28.004	0.23		26.538	0.1534		29.56	-0.3468
28.26	0.1974		26.795	-0.0958		29.813	-0.1442
28.516	0.2192		27.053	0.4769		30.075	0.285
28.773	0.1988		27.308	0.4052		30.262	0.2162
29.03	0.2414		27.5	0.2062		30.523	0.1191
29.286	0.234		27.757	0.1174		30.778	0.3101
29.543	0.2318		28.004	0.0564		31.094	0.0959
29.799	0.2274		28.271	-0.1523		31.353	-0.3316
30.054	0.2573		28.781	0.2461		31.61	-0.223
30.311	0.2305		29.03	0.1784		31.799	-0.0252
30.504	0.2557		29.296	0.2338		32.064	0.222
30.76	0.2545		29.551	0.1968		32.316	0.0872
31.008	0.2325		29.807	0.0744		32.503	0.12
31.272	0.237		30.003	0.1018		32.767	0.4093
31.528	0.2073		30.259	0.136		33.034	0.3667
31.786	0.2246		30.513	0.1487		33.34	0.3584
32.042	0.2384		30.771	-0.145		33.539	0.3431
32.296	0.2176		31.027	-0.2896		33.791	0.2944
32.555	0.2766		31.284	-0.1159		34.113	-0.2043
32.81	0.2658		31.54	0.3683		34.304	-0.031
33.003	0.2608		31.797	0.2484		34.563	0.3076
33.258	0.2125		32.757	0.1641		34.758	0.2635
33.519	0.2725		33.015	0.153		35.005	0.2273
33.772	0.238		33.271	0.141		35.262	0.2516
34.021	0.2417		34.038	0.0736		35.521	0.4495
34.285	0.2499		34.25	0.1214		35.787	0.3169
34.541	0.2526		34.551	-0.3299		36.104	0.3202
34.798	0.2523		35.003	0.1336		36.361	0.3601
35.048	0.2257		35.258	0.294		36.607	0.2452
35.309	0.2897		35.512	0.3878		36.809	0.2139
35.501	0.2475		36.54	0.1924		37.063	0.3825
35.758	0.2197		36.797	0.1286		37.254	0.3809
36.016	0.2256		38.016	0.1269		37.573	0.2541
36.272	0.2646		38.27	0.12		37.769	0.3444
36.527	0.2409		38.53	0.1357		38.025	0.4686
36.784	0.1763		38.775	0.1254		38.275	0.3003
37.039	0.1769		40.515	0.2323		38.533	0.3803
37.296	0.2557		40.771	0.2809		38.853	0.2434
37.553	0.2479		41.027	0.1297		39.042	0.3732
37.81	0.2309		41.283	0.0299		39.309	0.2965
38.006	0.1912		41.541	-0.3791		39.559	0.3922
38.259	0.2186		43.015	0.3201		39.832	0.361
38.514	0.2168		43.273	0.242		40.076	0.2545
38.768	0.2261		43.783	0.1111		40.265	0.326
39.026	0.221		44.04	0.2975		40.518	0.2836
39.284	0.228		44.297	0.1116		40.783	0.2956
39.539	0.2293		44.555	0.0635		41.035	0.3399
39.795	0.2534		45.002	0.1564		41.291	0.2245
40.052	0.2513		45.51	0.0892		41.552	0.4069
40.308	0.2092		45.772	0.1014		41.806	0.342
40.5	0.2142		46.029	0.1075		42	0.2403
40.751	0.2275		46.287	0.0681		42.317	0.1504
41.013	0.2494		46.801	-0.223		42.506	-0.2417
41.269	0.2149		47.054	-0.0403		42.764	-0.5055
41.526	0.2187		47.315	0.1523		43.027	-0.4621
41.777	0.2681		47.505	0.1543		43.278	-0.2945
42.039	0.2743		47.761	0.174		43.531	-0.3469
42.295	0.2953		48.018	0.1079		43.792	-0.3756
42.552	0.239		48.787	-0.1078		44.047	-0.2945
42.807	0.2643		49.043	0.1552		44.299	-0.4441
43	0.2888		49.297	0.121		44.551	-0.324
43.257	0.2551		49.546	-0.1222		44.754	-0.1432
43.514	0.2364		49.812	-0.3774		45.073	0.2293
43.77	0.2843		50.003	-0.423		45.263	0.1302
44.025	0.3174		50.262	0.3493		45.524	0.2402
44.282	0.2695		50.516	0.2594		45.78	0.2469
44.538	0.2655		50.772	0.1936		46.038	0.2851
44.789	0.262		51.031	0.2454		46.29	0.2273
45.051	0.2598		51.286	0.1692		46.548	0.3649
45.307	0.2491		51.544	0.1355		46.801	0.2564
45.563	0.2595		51.798	0.0761		47.058	0.2068
45.755	0.2181		52.057	-0.1107		47.317	0.2446
46.012	-0.0804		52.761	-0.1996		47.571	0.205
46.269	-0.154		53.015	0.0779		47.767	0.2505
48.502	0.0399		53.266	0.1461		48.024	0.1312
48.766	0.0752		55.004	-0.0986		48.282	0.258
49.28	0.1733		55.262	-0.1384		48.534	0.3612
49.536	0.1006		55.516	-0.102		48.789	0.2578
50.049	0.0299		55.773	0.1713		49.051	0.2557
50.306	0.2117		56.03	0.2035		49.304	0.2729
50.563	0.1606		56.277	-0.0278		49.558	0.2482
50.755	0.176		56.542	-0.367		49.751	0.247
51.011	0.1326		56.799	-0.2284		50.014	0.2534
51.266	0.1705		57.056	-0.3375		50.265	0.2996
51.517	0.1566		57.305	-0.4069		50.524	0.3618
51.78	0.1053		57.503	-0.2407		50.78	0.2872
52.036	0.1752		57.76	0.25		51.035	0.2755
53.767	-0.2049		58.018	0.1719		51.291	0.3525
54.023	-0.2447		58.274	0.1629		51.504	0.4105
54.277	-0.2707		58.528	0.2572		51.812	0.2614
54.536	-0.3142		58.787	0.2203		52.067	0.3253
54.793	-0.4337		59.035	0.1691		52.252	0.3006
55.049	-0.326		59.301	0.1342		52.5	0.2635
55.304	-0.3036		59.555	-0.1128		52.763	0.3541
55.554	-0.1879		59.814	-0.0308		53.019	0.3232
55.753	-0.0435		60.005	0.1167		53.279	0.3507
56.008	0.3159		60.261	-0.3729		53.539	0.3594
56.265	0.1918		60.517	-0.1002		53.859	0.2898
56.522	0.0873		60.773	0.1585		54.052	0.2352
56.778	0.1234		61.032	0.1618		54.304	0.3654
57.034	0.0573		61.288	0.1158		54.564	0.3267
57.29	0.11		61.543	0.1264		54.756	0.3952
57.547	0.0679		61.802	0.1815		55.014	0.433
57.804	-0.052		62.056	0.2123		55.267	0.2059
58.507	0.0129		62.312	0.2969		55.59	0.2268
58.765	0.0895		62.504	0.3338		55.777	0.2027
59.021	0.1518		62.756	0.3037		56.042	0.2803
59.272	0.0735		63.017	0.1197		56.357	0.2368
60.046	0.0581		63.275	0.207		56.613	0.2766
60.303	0.2083		63.531	0.1765		56.805	0.3461
60.56	0.2365		63.787	0.2312		57.056	0.2524
60.75	0.2149		64.045	0.1909		57.256	0.3621
61.008	0.1962		64.3	0.1638		57.573	0.212
61.265	0.1575		64.557	0.1144		57.768	0.3337
61.521	0.244		64.814	0.0542		58.025	0.3281
61.778	0.1699		65.005	-0.3027		58.283	0.1697
62.032	0.0792		65.263	-0.0187		58.604	0.1428
62.281	0.0712		65.517	0.3587		58.798	0.23
62.546	0.1019		65.769	0.1779		59.052	0.2136
62.804	0.0476		66.031	0.1052		59.307	0.2554
63.06	0.1167		66.288	-0.2583		59.552	0.1348
63.252	0.1402		66.544	-0.1846		59.76	0.2276
63.508	0.0751		66.792	0.2763		60.077	0.2421
63.764	0.092		67.057	0.1486		60.268	0.3029
64.02	0.1999		67.313	0.0659		60.593	0.2608
64.277	0.1902		67.507	-0.3723		60.779	0.3734
64.534	0.1483		67.764	0.1714		61.043	0.2933
64.789	0.1718		68.02	0.2342		61.294	0.289
65.046	0.1711		68.276	0.1392		61.539	0.3414
65.3	0.1859		68.532	0.0833		61.809	0.2854
65.557	0.1828		68.787	0.1346		62.068	0.3114
65.752	0.1497		69.046	0.0645		62.274	0.3744
66.001	0.1778		69.3	0.3208		62.513	0.481
66.262	0.218		69.558	0.3863		62.841	0.2684
66.523	0.2344		69.75	0.3673		63.018	0.3751
66.777	0.2228		70.004	0.2555		63.277	0.3477
67.032	0.2005		70.261	0.0164		63.605	0.2767
67.288	0.2457		70.519	-0.0302		63.791	0.4319
67.545	0.2266		70.776	0.2393		64.064	0.3604
67.803	0.2667		71.032	0.1064		64.308	0.2461
68.059	0.2501		71.541	0.2988		64.565	0.2607
68.25	0.241		71.801	0.229		64.774	0.1891
68.506	0.2682		72.057	0.1977		65.065	-0.3643
68.759	0.2558		72.25	0.1433		65.351	-0.2341
69.013	0.2299		72.57	0.0182		65.581	-0.0515
69.272	0.2297		72.764	-0.4094		65.864	0.2868
69.527	0.2342		73.021	-0.2998		66.102	0.3113
69.788	0.2244		73.275	-0.0077		66.361	0.2369
70.037	0.242		73.526	0.3139		66.552	0.2456
70.298	0.2196		73.787	0.1983		66.874	0.1607
70.555	0.209		74.301	0.168		67.064	0.1715
70.812	0.2358		74.557	0.1519		67.258	0.2872
71.001	0.2214		74.751	0.0866		67.571	0.2673
71.26	0.2006		75.005	0.0519		67.835	0.1964
71.515	0.2026		75.262	-0.3563		68.027	0.1444
71.773	0.2079		75.519	0.1183		68.286	0.1785
72.032	0.257		75.777	0.3611		68.606	0.2302
72.287	0.1665		76.031	0.1811		68.799	0.2683
72.54	0.218		76.289	0.0987		69.049	0.3486
72.796	0.1916		76.803	0.0812		69.31	0.2254
73.049	0.2257		77.25	0.0452		69.503	0.2808
73.312	0.2647		77.508	0.1161		69.761	0.2811
73.509	0.2883		78.021	0.0868		70.02	0.2386
73.758	0.2308		78.277	0.2149		70.332	0.2444
74.014	0.244		78.532	0.2478		70.529	0.3179
74.271	0.228		78.789	0.1283		70.85	0.2181
74.526	0.2287		79.304	0.1521		71.039	0.3294
74.783	0.2667		79.572	0.063		71.303	0.2793
75.04	0.2561		79.753	0.0861		71.618	0.2387
75.294	0.2532		80.009	0.1914		71.828	0.2249
75.556	0.2648		80.256	-0.491		72.003	0.2742
75.808	0.2583		80.776	0.1755		72.265	0.3619
76.069	0.259		81.035	0.1674		72.514	0.2292
76.256	0.2778		81.291	0.2655		72.772	0.3147
76.513	0.2324		81.545	0.1468		73.023	0.3741
76.765	0.219		81.804	-0.1104		73.337	0.2524
77.025	0.2193		82.058	-0.074		73.536	0.3467
77.283	0.13		82.858	0.0594		73.801	0.316
77.538	0.1979		83.05	0.1124		74.118	0.2943
77.799	0.2218		83.31	0.1931		74.307	0.3345
78.053	0.2581		83.756	-0.2126		74.565	0.3198
78.313	0.2399		84.078	-0.4208		74.82	0.219
78.504	0.2634		84.27	-0.1999		75.011	0.1866
78.76	0.2593		84.53	-0.1423		75.272	0.2582
79.012	0.2427		84.78	-0.0597		75.59	0.2444
79.269	0.2496		85.042	0.3912		75.782	0.1816
79.524	0.2695		85.298	0.1731		76.039	0.2432
79.776	0.2537		85.552	-0.2808		76.29	0.2049
80.037	0.2789		85.81	-0.2759		76.552	0.2874
80.294	0.2676		86.005	-0.0687		76.807	0.2261
80.55	0.2812		86.259	-0.0571		77.002	0.2363
80.802	0.2828		86.506	0.2216		77.319	0.1966
81.065	0.1876		86.771	0.266		77.579	-0.1773
81.255	0.1669		87.094	0.168		77.77	-0.0434
81.512	0.2647		87.285	0.0469		78.024	0.326
81.767	0.2356		87.601	-0.0185		78.283	0.2719
82.024	0.2503		87.797	0.2521		78.536	0.2629
82.281	0.2467		88.052	0.1837		78.797	0.2475
82.537	0.2646		88.312	0.1146		79.057	0.2425
82.793	0.2561		89.013	0.2291		79.257	0.1507
83.049	0.2566		89.333	-0.1056		80.012	0.3833
83.307	0.2653		89.525	-0.071		80.272	0.3958
83.562	0.2658		89.785	-0.0906		80.526	0.2825
83.754	0.2809		90.102	-0.0218		80.779	0.2714
84.011	0.2561		90.295	0.1879		81.035	0.1953
84.267	0.2748		90.552	0.0787		81.298	0.1943
84.525	0.3034		91.258	-0.2974		81.554	0.136
84.779	0.3083		91.518	-0.0864		81.814	0.1542
85.036	0.2542		91.771	0.122		82.062	0.08
85.293	0.2547		92.026	0.2309		83.095	0.2333
85.556	0.2347		92.276	0.0692		83.285	0.2883
85.805	0.2534		93.566	-0.1132		83.545	0.2305
86.061	0.2424		93.757	-0.0195		83.872	0.2093
86.254	0.2392		94.012	0.072		84.116	0.1755
86.505	0.2772		94.265	0.1079		84.309	0.1365
86.767	0.2914		94.529	0.07		84.501	0.115
87.024	0.1708		96.265	-0.0426		84.767	0.0713
87.279	0.1865		96.521	-0.0692		85.076	0.1058
87.53	0.1772		96.775	-0.0749		85.273	0.1114
87.791	0.1696		97.026	-0.1926		85.847	-0.1847
88.048	0.1657		97.286	-0.2019		86.039	-0.0298
88.305	0.2099		98.061	-0.0532		86.288	0.1949
88.561	0.2185		98.371	-0.0894		86.553	0.1728
88.753	0.2162		98.567	-0.0413		86.814	0.176
89.012	0.1726		99.276	0.0954		87.004	0.0913
89.268	0.2791		99.527	0.2097		88.537	-0.5979
89.525	0.2318		100.044	-0.3948		88.859	-0.1333
89.78	0.2315		100.362	-0.0474		89.317	0.236
90.038	0.2176		100.555	0.1373		89.563	0.0993
90.29	0.2166		100.814	0.1674		89.76	0.2829
90.547	0.158		101.008	-0.1297		90.013	0.1707
90.807	0.1187		101.256	-0.1164		90.276	-0.1492
91.066	0.1601		103.824	-0.2251		90.528	-0.4306
91.26	0.1835		104.012	-0.2574		90.847	-0.3401
91.51	0.1906		104.528	0.1527		91.043	-0.1308
91.767	0.1946		104.785	0.0456		91.361	0.2072
92.025	0.145		105.096	-0.1244		91.564	0.1108
92.278	0.1779		105.818	0.186		91.845	0.2027
92.536	0.1703		106.008	0.1688		92	0.2102
92.793	0.1685		106.261	0.0859		92.51	-0.1546
93.053	0.2177		106.509	0.0628		92.785	-0.0612
93.304	0.1951		107.293	0.0955		93.368	0.0106
93.56	0.1864		107.545	0.1859		93.679	-0.2191
93.753	0.2409		108.314	-0.255		93.869	-0.3183
94.011	0.2315		108.522	-0.1407		94.175	-0.2455
94.262	0.243		109.019	0.1355		94.578	-0.0873
94.524	0.2631		109.788	-0.1226		94.77	0.1275
94.779	0.3029		110.042	-0.0686		95.08	0.1509
95.04	0.2889		111.83	-0.2612		97	0.1144
95.291	0.2461		112.029	-0.3399		98	0.2207
95.549	0.2352		112.28	-0.2653		99	0.2252
95.806	0.2203		112.544	-0.2499		101.82	0.1779
96.063	0.1764		112.867	-0.139		102.065	0.0832
96.254	0.2002		113.059	-0.2772		102.591	0.1759
96.51	0.1478		113.26	-0.2254		102.843	-0.1502
96.768	0.1708		113.568	0.1165		103.033	-0.3197
97.023	0.1639		113.759	0.2202		103.291	-0.0377
97.272	0.2131		114.018			103.61	-0.2243
97.535	0.2269					103.809	-0.2572
97.791	0.2391					104.062	-0.2023
98.046	0.2196					104.259	-0.3518
98.299	0.2516					104.573	-0.0858
98.559	0.2143					104.768	0.1194
98.752	0.2213					105.04	0.1382
99.007	0.22					105.793	0.1129
99.267	0.3037					106.109	0.1751
99.523	0.2985					106.305	0.1306
99.778	0.2766					108.562	-0.2871
100.035	0.2487					108.796	-0.2474
100.293	0.2856					109.057	-0.1215
100.547	0.251					109.268	-0.0326
100.804	0.2629					109.506	0.2338
101.06	0.2158					109.768	0.2272
101.253	0.2453					110.018	0.0975
101.51	0.2746					110.281	0.0789
101.766	0.2453					111.052	-0.3846
102.022	0.2172					111.305	-0.4543
102.277	0.2142					111.561	-0.4041
102.534	0.2717					111.822	-0.1649
102.79	0.2358					112.012	0.0449
103.049	0.2582					112.277	0.289
103.301	0.2551					112.522	0.3171
103.56	0.2635					112.839	0.2015
103.751	0.2659					113.032	0.1706
104.001	0.2957					113.358	0.1624
104.263	0.237					113.609	0.1274
104.519	0.2317					113.803	0.1507
104.777	0.2375					114.059	0.1507
105.028	0.1878					114.318	0.161
105.289	0.1832					114.511	0.185
107.277	0.0211					114.766	0.2597
107.532	0.0878					115.086	0.249
107.789	0.1269					115.274	0.2581
108.039	0.2191					115.539	0.151
108.3	0.2545					117.005
108.556	0.2597
108.75	0.2045
109.006	0.182
109.26	0.2106
109.517	0.2069
109.775	0.1515
110.03	0.1414
110.286	0.1761
110.545	0.1251
110.8	0.1732
111.059	0.1399
111.313	0.0863
111.506	0.0936
111.754	0.1384
112.019	0.2414
112.274	0.1617
112.531	0.1549
112.787	0.1587
113.043	0.172
113.301	0.1348
113.555	0.1612
113.811	0.2058
114.005	0.2578
114.26	0.2883
114.517	0.2091
114.772	0.1702
115.031	0.2281
115.287	0.1889
115.541	0.1769
115.794	0.2055
116.054	0.2353
116.313	0.2474
116.502	0.2777
116.759	0.2324
117.018	0.1846
117.272	0.1679
117.529	0.2225
117.784	0.2615
118.043	0.2114
118.299	0.1767
118.555	0.1721
118.804	0.2401
119.003	0.2156
119.261	0.1892
119.514	0.1952
119.771	0.2602
120.028	0.1962
120.284	0.1573
120.539	0.1211
120.8	0.1538
121.051	0.1654
121.253	0.1408
121.566	0.1205
121.757	0.1259
122.016	0.1597
122.27	0.2066
122.521	0.1971
122.784	0.2057
123.041	0.232
123.296	0.1467
123.553	0.1963
123.809	0.1362
124.004	0.1296
124.262	0.1923
124.515	0.2204
124.771	0.2152
125.027	0.3375
125.283	0.2687
125.532	0.2342
125.797	0.2205
126.053	0.2123
126.308	0.178
126.5	0.1843
126.757	0.2233
127.014	0.1809
127.271	0.2675
127.524	0.3445
127.781	0.2606
128.039	0.166
128.295	0.1695
128.549	0.1704
128.811	0.1264
129.001	0.0603
129.252	0.09
129.515	0.1712
129.77	0.1718
130.025	0.1907
130.28	0.2206
130.538	0.1914
130.794	0.2244
131.05	0.1703
131.308	0.1413
131.5	0.1578

## Sheet: Figure 1B
Average speed (wormlength/sec)
	wild type	zf35	zf35/+
	0.140326	0.161163	0.186579
	0.077786	0.158389	0.159113
	0.101763	0.205164	0.111201
	0.195482	0.202744	0.113476
	0.0835348	0.181523	0.194484
	0.12811	0.0935644	0.121575
	0.119415	0.162158	0.17861
	0.109062	0.118742	0.147853
	0.104371	0.125225	0.183486
		0.152649	0.156504

## Sheet: Figure 1C
Reversal/ 3 min on regular OP50
	wild type	zf35	zf35/+
	10	32	46
	9	23	40
	5	46	24
	14	51	32
	9	48	23
	7	2	41
	7	40	28
	11	50	31
	8	52	39
	7	47	46
	9	65	19
	8	41	39
	9	45	41
	5	63	35
	7	19	26
	7	56	30
	10	67	33
	3	46	29
	9	45	27
	15	55	25
	9	90	43
	11	40	35
	6	31	31
	2	63
	4	50
	5	22
	5	52
	4	17
	8	60
	5	55
	11	47
	11	34
	9	41
	5	34
	5	22
	3	30
	6	32
	11	39
	5	41
	10	35
	4	42
	1	47
	7	46
	6	43
	2	17
	6	38
	6	14
	7	38
	10	58
	4	63
	7	62
	9	38
	6	36
	6	52
	3	36
	3	58
	3	56
	6	31
	2	41

## Sheet: Figure 1D
Number of unlaid eggs in the uterus
	wild type	unc-2(zf35)
	15	6
	9	3
	14	5
	0	5
	11	3
	7	3
	13	4
	14	5
	6	4
	13	2
	11	5
	13	2
	2	2
	11	3
	9	3
	2	1
	16	5
	9	2
	11	4
	6	2
	13	5
	13	1
	14	2
	7	3
	22	2
	3	3
	15	4
	18	2
	20	2
	14	2
	11	3
	19	2
	13	4
	13	2
	8	3
	18	4
	14	2
	21	2
	15	2
	19	3
	11	2
	26	3
	19	3
	16	3
	20	1
	21	4
	25	3
	17	3
	13	2
	11	3
	16	2
	15	5
	12	4
	25	3
	13	3
	18	5
	12	2
	14	3
	8	2
	14	2
	25	2
	22	1
	20	3
	16	3
	14	5
	21	5
	17	8
	17	6
	18	5
	15	7
	20	4
	16	6
	10	6
	16	8
	11	5
	18	6
	19	4
	20	3
	15	5
	15	6
		6
		7
		4
		6
		4
		6

## Sheet: Figure 1E
embryonic stages of freshly laid eggs
(%)	wild type					zf35
0-to-16 cell	0	11.54	2.44	5.63	6.25	60	25	33.33	33.33	60.8
17-to comma	100	89.66	97.62	90.14	94.11	40	75	66.67	66.67	39.1
postcomma	0	0	0	4.22	0	0	0	0	0	0
