# Supplementary material for: Gain-of-function mutations in the UNC-2/CaV2α channel lead to excitation-dominant synaptic transmission in Caenorhabditis elegans
Source: eLife journal article supplement (doi:10.7554/elife.45905), 2019-07-31
Supplement: supp [file elife-45905-supp-v2.zip › elife_poa_e45905_Figure_2_source_data_1.xlsx]

## Sheet: Figure 2E
Reversal/ 3 min on regular OP50
	wild type	unc-2(zf35)	unc-2(lf)	Ex unc-2(wt)	Ex unc-2(zf35)	Ex unc-2(wt); unc-2(e55lf)	Ex unc-2(zf35); unc-2(e55lf)
	10	32	2	5	52	4	55
	9	23	0	6	20	6	48
	5	46	0	7	32	6	48
	14	51	4	9	28	0	54
	9	48	1	11	31	1	55
	7	2	4	8	47	3	29
	7	40	3	9	38	8	28
	11	50	3	8	26	3	33
	8	52	4	6	22	1	52
	7	47	1	6	29	4	26
	9	65	4		47	5	63
	8	41	3		29	5	43
	9	45	4		44		16
	5	63	3		36		5
	7	19	2		27		19
	7	56	4		31		24
	10	67	3		33		59
	3	46	2		52		57
	9	45	4		16		56
	15	55	4		24		49
	9	90	4		34		49
	11	40	1		27
	6	31	2
	2	63	5
	4	50	5
	5	22	2
	5	52	5
	4	17	4
	8	60	2
	5	55	5
	11	47	3
	11	34	2
	9	41	0
	5	34	0
	5	22	0
	3	30	2
	6	32	1
	11	39	3
	5	41	3
	10	35	2
	4	42	1
	1	47	5
	7	46	3
	6	43	1
	2	17	4
	6	38	2
	6	14	3
	7	38	3
	10	58	1
	4	63	1
	7	62	2
	9	38	1
	6	36	3
	6	52	0
	3	36	1
	3	58	0
	3	56	2
	6	31	1
	2	41	0
	10	31
	6	57
	8	53
	2	21
	5	35
	7	54
	2
	4
	6
	9
	3

## Sheet: Figure 2F
Number of thrashes in M9 solution for 30 seconds
wild type	unc-2(zf35gf)	unc-2(eelf)	unc-2(zf109)	unc-2(zf113)	unc-2(zf114)	unc-2(zf115)	unc-2(zf124)	unc-2(zf130)	unc-2(zf134)
100	88	8	10	6	98	4	8	74	8
92	120	4	10	6	94	10	4	86	56
104	142	8	4	4	98	10	2	86	28
124	138	6	10	8	86	6	6	92	30
110	130	2	6	4	82	8	6	40	18
124	104	6	6	2	84	4	8	84	54
114	114	6	10	10	92	8	6	94	34
112	128	8	8	2	88	6	6	88	20
98	134	6	6	10	82	16	6	80	20
88	140	6	6	16	80	14	4	72	72
118	144	6	2	4	88	10	6	92	68
120	128	2	4	10	102	8	4	80	24
62	154	2	8	6	92	4	6	96	48
118	122	8	2	0	90	4	2	90	64
114	146	4	4	6	84	8	8	78	28
118	144	4	8	2	86	12	2	88	14
116	138	6	4	0	92	6	8	70	32
108	110	6	10	12	76	12	12	86	58
122	128	6	4	2	76	8	4	52	18
124	128	4	10	6	90	18	2	54	38
116	138	8	6	12	98	0	6	36	26
104	104	4	2	0	88	14	8	44	40
118	146	4	6	0	90	4	6	44	30
124	130	4	2	12	72	10	10	86	10
100	148	6	8	4	88	6	4	50	12
116	112	2	6	4	74	4	2	68	20
120	110	6	2	4	106	6	4	78	52
96	134	8	4	4	104	4	4	38	18
108	126	6	4	6	84	6	4	18	58
106	146	4	6	4	76	8	2	96	12
96	136	6	6	4	86	6	4	76	30
116	108	6	6	8	84	4	2	52	28
98	132	4	20	10	88	4	14	98	4
106	122	2	2	4	96	8	2	52	48
106	140	6	10	10	100	4	4	60	50
126	134	4	8	2	68	4	2	84	54
106	122	6	8	14	84	10	6	24	48
120	128	2	6	8	80	6	8	22	8
114	144	8	18	6	80	8	6	96	18
98	128	2	6	6	98	4	12	50	42
112	128	4	12	4	94	6	0	54	26
120	120	4	8	4	80	6	10	78	24
120	132	6	4	14	88	6	2	42	30
112	136	4	20	4	92	4	8	20	20
108	122	2	8	8	98	6	2	44	20
92	110	4	4	4	90	8	6	80	30
88	116	2	2	4	82	12	8	88	2
122	128	2	2	6	98	8	8	70	12
118	132	2	12	4	90	14	8	32	46
112	106	8	2	4	80	0	2	78	10
112	134	2	14	4	92	2	6	42
84	128	2	4	2	94	4	4	74
90	134	2	8	2	70	6	12	58
90	148	10		2	86	0	2	98
100	130	6		4	88	2	2	80
104	124	6		4	86	10	4	84
108	106	2		8	68		2	64
98	118				68			56
58	122				60
94	144				64
