# Supplementary material for: Gain-of-function mutations in the UNC-2/CaV2α channel lead to excitation-dominant synaptic transmission in Caenorhabditis elegans
Source: eLife journal article supplement (doi:10.7554/elife.45905), 2019-07-31
Supplement: supp [file elife-45905-supp-v2.zip › elife_poa_e45905_Figure_3_source_data_1.xlsx]

## Sheet: Figure 3B
Membrane Voltage	VAR2	average PA/PF G1518R	DE	Predicted 1	Residuals 1	XSmooth 1	YSmooth 1	VAR5	average PA/PF WT	DE	Predicted 4	Residuals 4	XSmooth 4	YSmooth 4
-50		0	0	0.102358	-0.149156	-50	0.102358		0	0	0.259088	-0.151766	-50	0.259088
-45		0	0	0.103587	-0.0448086	-49.15	0.103587		0	0	0.107385	-0.0916216	-49.15	0.107385
-40		0	0	0.106514	0.0297023	-48.3	0.106514		0	0	-0.0156849	-0.0410543	-48.3	-0.0156849
-35		-1.54737	0.580572	0.109198	0.0778435	-47.45	0.109198		0	0	-0.112191	0.000524921	-47.45	-0.112191
-30		-2.392	1.476	0.109704	0.103034	-46.6	0.109704		0	0	-0.184201	0.0337019	-46.6	-0.184201
-25		-7.56	3.108	0.106108	0.108633	-45.75	0.106108		0	0	-0.233777	0.0590592	-45.75	-0.233777
-20		-13.04	1.14	0.0964978	0.0979252	-44.9	0.0964978		-2.1072	1.204	-0.262975	0.0771757	-44.9	-0.262975
-15		-27.216	5.58	0.0789729	0.0740968	-44.05	0.0789729		-4.6176	1.659	-0.27385	0.0886258	-44.05	-0.27385
-10		-49.968	8.762	0.05165	0.0402105	-43.2	0.05165		-11.2464	2.7615	-0.268446	0.0939793	-43.2	-0.268446
-5		-72.632	6.962	0.0126648	-0.000836069	-42.35	0.0126648		-24.504	4.2915	-0.248802	0.0938003	-42.35	-0.248802
0		-80.2	9.78265	-0.0398248	-0.0463656	-41.5	-0.0398248		-36.16	2.09443	-0.216951	0.0886467	-41.5	-0.216951
5		-76.96	6.294	-0.107634	-0.0940024	-40.65	-0.107634		-44.4864	4.2355	-0.174915	0.079069	-40.65	-0.174915
10		-71.552	7.512	-0.192548	-0.143756	-39.8	-0.192548		-47.52	4.37182	-0.124705	0.0656098	-39.8	-0.124705
15		-64.352	4.782	-0.296318	-0.1973	-38.95	-0.296318		-45.9936	6.6755	-0.0683211	0.0488018	-38.95	-0.0683211
20		-54.544	5.86	-0.420662	-0.243284	-38.1	-0.420662		-40.2672	3.0625	-0.00774966	0.0291668	-38.1	-0.00774966
25		-45.864	3.63	-0.566789	-0.0494083	-37.25	-0.566789		-33.3504	2.5095	0.0550395	0.00721416	-37.25	0.0550395
30		-32.016	2.986	-0.740756	0.013384	-36.4	-0.740756		-26.712	3.255	0.118095	-0.0165617	-36.4	0.118095
35		-24.904	3.824	-0.934956	0.0701267	-35.55	-0.934956		-21.792	2.9505	0.179488	-0.0416833	-35.55	0.179488
				-1.1511	0.124415	-34.7	-1.1511				0.237315	-0.0676926	-34.7	0.237315
				-1.37939	0.165128	-33.85	-1.37939				0.289702	-0.0941545	-33.85	0.289702
				-1.64321	0.195442	-33	-1.64321				0.336346	-0.121791	-33	0.336346
				-1.94502	-0.106687	-32.15	-1.94502				0.375767	-0.140734	-32.15	0.375767
				-2.28697	-0.144136	-31.3	-2.28697				0.406062	-0.153632	-31.3	0.406062
				-2.67221	-0.187998	-30.45	-2.67221				0.428153	-0.162881	-30.45	0.428153
				-3.10495	-0.249739	-29.6	-3.10495				0.443242	-0.17131	-29.6	0.443242
				-3.58186	-0.336568	-28.75	-3.58186				0.450206	-0.180106	-28.75	0.450206
				-4.10707	-0.432484	-27.9	-4.10707				0.44573	-0.176569	-27.9	0.44573
				-4.69369	-0.0901645	-27.05	-4.69369				0.425501	-0.170193	-27.05	0.425501
				-5.35612	-0.105759	-26.2	-5.35612				0.384267	-0.162116	-26.2	0.384267
				-6.1106	-0.120561	-25.35	-6.1106				0.315758	-0.151494	-25.35	0.315758
				-6.974	-0.107171	-24.5	-6.974				0.212857	-0.13897	-24.5	0.212857
				-7.92492	-0.103382	-23.65	-7.92492				0.0681553	-0.125681	-23.65	0.0681553
				-9.00315	-0.0965894	-22.8	-9.00315				-0.126136	-0.126326	-22.8	-0.126136
				-10.2366	-0.38692	-21.95	-10.2366				-0.377902	-0.122002	-21.95	-0.377902
				-11.6512	-0.215876	-21.1	-11.6512				-0.694821	-0.112933	-21.1	-0.694821
				-13.2732	0.00403065	-20.25	-13.2732				-1.08393	-0.0995586	-20.25	-1.08393
				-15.1273	0.260366	-19.4	-15.1273				-1.55092	-0.0819818	-19.4	-1.55092
				-17.3074	0.635816	-18.55	-17.3074				-2.09834	-0.0599367	-18.55	-2.09834
				-19.7541	1.05973	-17.7	-19.7541				-2.71881	-0.0247274	-17.7	-2.71881
				-22.4653	1.29348	-16.85	-22.4653				-3.3559	0.0637995	-16.85	-3.3559
				-25.4352	1.41401	-16	-25.4352				-3.96673	0.14805	-16	-3.96673
				-28.6464	1.5542	-15.15	-28.6464				-4.66564	0.138166	-15.15	-4.66564
				-32.0379	1.65526	-14.3	-32.0379				-5.5047	0.0812931	-14.3	-5.5047
				-35.6377	1.76848	-13.45	-35.6377				-6.57983	0.0282599	-13.45	-6.57983
				-39.409	1.87565	-12.6	-39.409				-7.88616	0.0125671	-12.6	-7.88616
				-43.2977	1.13807	-11.75	-43.2977				-9.35388	0.00751779	-11.75	-9.35388
				-47.2431	0.551825	-10.9	-47.2431				-10.9663	0.00737498	-10.9	-10.9663
				-51.1827	-0.0549158	-10.05	-51.1827				-12.7014	0.00287839	-10.05	-12.7014
				-55.0588	-0.711426	-9.2	-55.0588				-14.539	-0.00540387	-9.2	-14.539
				-58.7982	-1.37211	-8.35	-58.7982				-16.4692	-0.00551016	-8.35	-16.4692
				-62.3344	-2.01832	-7.5	-62.3344				-18.4793	-0.000496373	-7.5	-18.4793
				-65.6177	-0.99144	-6.65	-65.6177				-20.5476	0.00712595	-6.65	-20.5476
				-68.6062	-1.1035	-5.8	-68.6062				-22.6551	0.0155661	-5.8	-22.6551
				-71.2657	-1.23721	-4.95	-71.2657				-24.7843	0.0240315	-4.95	-24.7843
				-73.5683	-1.30646	-4.1	-73.5683				-26.9179	0.0317909	-4.1	-26.9179
				-75.5037	-1.40016	-3.25	-75.5037				-29.0388	0.0381701	-3.25	-29.0388
				-77.0709	-2.43456	-2.4	-77.0709				-31.1296	0.0424686	-2.4	-31.1296
				-78.2729	-1.82525	-1.55	-78.2729				-33.1731	0.0439828	-1.55	-33.1731
				-79.1207	-1.20815	-0.7	-79.1207				-35.1545	0.0436828	-0.7	-35.1545
				-79.6322	-0.622707	0.15	-79.6322				-37.0555	0.0391628	0.15	-37.0555
				-79.8371	-0.108279	1	-79.8371				-38.8547	0.0252551	1	-38.8547
				-79.786	0.369215	1.85	-79.786				-40.5351	0.00614232	1.85	-40.5351
				-79.5072	0.933092	2.7	-79.5072				-42.0791	-0.0177692	2.7	-42.0791
				-79.0347	0.921038	3.55	-79.0347				-43.4703	-0.0481208	3.55	-43.4703
				-78.4031	0.86843	4.4	-78.4031				-44.6879	-0.0897751	4.4	-44.6879
				-77.6437	0.795202	5.25	-77.6437				-45.6953	-0.167169	5.25	-45.6953
				-76.7709	0.704606	6.1	-76.7709				-46.3153	-0.274438	6.1	-46.3153
				-75.7662	0.570795	6.95	-75.7662				-46.6159	-0.29893	6.95	-46.6159
				-74.6839	0.390628	7.8	-74.6839				-46.9492	-0.227196	7.8	-46.9492
				-73.5437	0.185991	8.65	-73.5437				-47.2898	-0.215831	8.65	-47.2898
				-72.3596	0.0088195	9.5	-72.3596				-47.5141	-0.224428	9.5	-47.5141
				-71.1457	-0.131122	10.35	-71.1457				-47.602	-0.235959	10.35	-47.602
				-69.9692	-0.16887	11.2	-69.9692				-47.5512	-0.235873	11.2	-47.5512
				-68.7596	-0.17281	12.05	-68.7596				-47.3643	-0.232932	12.05	-47.3643
				-67.5116	0.00218114	12.9	-67.5116				-47.046	-0.227011	12.9	-47.046
				-66.2213	0.099965	13.75	-66.2213				-46.6029	-0.217962	13.75	-46.6029
				-64.8833	0.200183	14.6	-64.8833				-46.0427	-0.205714	14.6	-46.0427
				-63.4911	0.29627	15.45	-63.4911				-45.3737	-0.189242	15.45	-45.3737
				-62.034	0.369598	16.3	-62.034				-44.6052	-0.170554	16.3	-44.6052
				-60.5236	0.418215	17.15	-60.5236				-43.7469	-0.14985	17.15	-43.7469
				-58.9583	0.0858732	18	-58.9583				-42.8089	-0.127237	18	-42.8089
				-57.3367	-0.0601665	18.85	-57.3367				-41.8015	-0.102754	18.85	-41.8015
				-55.659	-0.224953	19.7	-55.659				-40.7391	-0.0758274	19.7	-40.7391
				-53.9261	-0.419526	20.55	-53.9261				-39.6291	-0.049043	20.55	-39.6291
				-52.1423	-0.625784	21.4	-52.1423				-38.4801	-0.0229718	21.4	-38.4801
				-50.3134	-0.819718	22.25	-50.3134				-37.3003	0.00182132	22.25	-37.3003
				-48.4454	-0.331422	23.1	-48.4454				-36.0983	0.0247774	23.1	-36.0983
				-46.5634	-0.278713	23.95	-46.5634				-34.8823	0.0453438	23.95	-34.8823
				-44.6705	-0.212248	24.8	-44.6705				-33.6608	0.0629742	24.8	-33.6608
				-42.7756	-0.0990696	25.65	-42.7756				-32.4419	0.0771275	25.65	-32.4419
				-40.8872	0.0309095	26.5	-40.8872				-31.2341	0.0872677	26.5	-31.2341
				-39.0136	0.15533	27.35	-39.0136				-30.0455	0.0928634	27.35	-30.0455
				-37.1628	0.262919	28.2	-37.1628				-28.8847	0.0933872	28.2	-28.8847
				-35.3429	0.34355	29.05	-35.3429				-27.7597	0.0883154	29.05	-27.7597
				-33.5616	0.387905	29.9	-33.5616				-26.6788	0.0771273	29.9	-26.6788
				-31.8265	0.387247	30.75	-31.8265				-25.6505	0.0593052	30.75	-25.6505
				-30.1453	0.333265	31.6	-30.1453				-24.6828	0.0343337	31.6	-24.6828
				-28.5253	0.217965	32.45	-28.5253				-23.7841	0.00169971	32.45	-23.7841
				-26.9741	0.0335919	33.3	-26.9741				-22.9627	-0.039108	33.3	-22.9627
				-25.499	-0.227424	34.15	-25.499				-22.2267	-0.0885988	34.15	-22.2267
				-24.1072	-0.57251	35	-24.1072				-21.5844	-0.147281	35	-21.5844

## Sheet: Figure 3C
MEMBRANE VOLTAGE	WT	DE		G1518r	DE			Parameters 3	Predicted 3	Residuals 3	x column 3	y column 3	Parameters 4	Predicted 6	Residuals 6	VAR17	x column 4	y column 4
-50	0	0		0	0			1.0351	6.52479e-06	-6.52479e-06	-50	6.52479e-06	1.05601	0.000101635			-50	0.000101635
-45	0	0		0	0			3.87987	6.52479e-06	-6.52479e-06	-49.7656	6.93109e-06	4.10896	0.000101635	-0.000101635		-49.8047	0.000106582
-40	0	0		0	0			-3.54096	2.36721e-05	-2.36721e-05	-49.5312	7.36268e-06	-11.9982	0.000343098	-0.000343098		-49.6094	0.00011177
-35	0	0		-0.00684211	0.0096762				8.58791e-05	-8.58791e-05	-49.2969	7.82115e-06		0.00115759	-0.00115759		-49.4141	0.000117211
-30	0	0		-0.0173684	0.0245627				0.000311508	-0.000311508	-49.0625	8.30817e-06		0.00389851	0.0029436		-49.2188	0.000122916
-25	0	0		-0.0570254	0.0518434				0.00112929	-0.00112929	-48.8281	8.82551e-06		0.013049	0.0043194		-49.0234	0.000128899
-20	-0.0439331	0.0344237		-0.125482	0.0190431				0.00408543	-0.00408543	-48.5938	9.37507e-06		0.0428037	0.0142217		-48.8281	0.000135173
-15	-0.0962343	0.0474185		-0.240151	0.042957				0.0146701	0.029263	-48.3594	9.95885e-06		0.13183	-0.0163478		-48.6328	0.000141753
-10	-0.23431	0.0788814		-0.512054	0.0127263				0.051313	0.0449213	-48.125	1.0579e-05		0.343283	0.0168679		-48.4375	0.000148653
-5	-0.51046	0.0368633		-0.85794	0.0326865				0.164709	0.0296005	-47.8906	1.12377e-05		0.653921	-0.0218672		-48.2422	0.000155888
0	-0.794979	0.0026979		-0.99	0				0.421366	-0.070906	-47.6562	1.19375e-05		0.89333	0.0246097		-48.0469	0.000163476
5	-0.926778	0.0352858		-0.936978	0.0548874				0.738585	0.0563938	-47.4219	1.26808e-05		1.00197	-0.0119721		-47.8516	0.000171433
10	-0.99	0		-0.85692	0.0251963				0.931971	-0.00519301	-47.1875	1.34704e-05					-47.6562	0.000179777
15	-0.958159	0.0192703		-0.779402	0.0797441				1.00446	-0.0144617	-46.9531	1.43092e-05					-47.4609	0.000188527
20	-0.838912	0.0875429		-0.656814	0.13104						-46.7188	1.52003e-05					-47.2656	0.000197703
25	-0.694812	0.0717232		-0.560818	0.110492						-46.4844	1.61468e-05					-47.0703	0.000207325
30	-0.556485	0.0929765		-0.462739	0.133082						-46.25	1.71522e-05					-46.875	0.000217416
35	-0.453975	0.0842727		-0.348836	0.130414						-46.0156	1.82203e-05					-46.6797	0.000227998
40	-0.387029	0.091916		-0.283023	0.0813222						-45.7812	1.93548e-05					-46.4844	0.000239095
45	-0.27431	0.0829792		-0.235401	0.0987994						-45.5469	2.056e-05					-46.2891	0.000250731
											-45.3125	2.18402e-05					-46.0938	0.000262934
											-45.0781	2.32002e-05					-45.8984	0.000275731
											-44.8438	2.46448e-05					-45.7031	0.00028915
											-44.6094	2.61794e-05					-45.5078	0.000303222
											-44.375	2.78096e-05					-45.3125	0.000317979
											-44.1406	2.95412e-05					-45.1172	0.000333454
											-43.9062	3.13807e-05					-44.9219	0.000349681
											-43.6719	3.33347e-05					-44.7266	0.000366698
											-43.4375	3.54104e-05					-44.5312	0.000384543
											-43.2031	3.76153e-05					-44.3359	0.000403256
											-42.9688	3.99575e-05					-44.1406	0.000422879
											-42.7344	4.24456e-05					-43.9453	0.000443457
											-42.5	4.50885e-05					-43.75	0.000465035
											-42.2656	4.78961e-05					-43.5547	0.000487663
											-42.0312	5.08784e-05					-43.3594	0.000511392
											-41.7969	5.40464e-05					-43.1641	0.000536274
											-41.5625	5.74117e-05					-42.9688	0.000562367
											-41.3281	6.09865e-05					-42.7734	0.000589728
											-41.0938	6.47839e-05					-42.5781	0.00061842
											-40.8594	6.88177e-05					-42.3828	0.000648507
											-40.625	7.31027e-05					-42.1875	0.000680057
											-40.3906	7.76544e-05					-41.9922	0.00071314
											-40.1562	8.24896e-05					-41.7969	0.000747832
											-39.9219	8.76257e-05					-41.6016	0.00078421
											-39.6875	9.30817e-05					-41.4062	0.000822357
											-39.4531	9.88773e-05					-41.2109	0.000862358
											-39.2188	0.000105034					-41.0156	0.000904302
											-38.9844	0.000111574					-40.8203	0.000948285
											-38.75	0.00011852					-40.625	0.000994405
											-38.5156	0.0001259					-40.4297	0.00104277
											-38.2812	0.000133738					-40.2344	0.00109348
											-38.0469	0.000142065					-40.0391	0.00114665
											-37.8125	0.00015091					-39.8438	0.00120241
											-37.5781	0.000160306					-39.6484	0.00126087
											-37.3438	0.000170287					-39.4531	0.00132218
											-37.1094	0.000180888					-39.2578	0.00138646
											-36.875	0.00019215					-39.0625	0.00145386
											-36.6406	0.000204113					-38.8672	0.00152453
											-36.4062	0.000216821					-38.6719	0.00159864
											-36.1719	0.000230319					-38.4766	0.00167634
											-35.9375	0.000244657					-38.2812	0.00175781
											-35.7031	0.000259888					-38.0859	0.00184323
											-35.4688	0.000276067					-37.8906	0.00193279
											-35.2344	0.000293253					-37.6953	0.00202671
											-35	0.000311508					-37.5	0.00212517
											-34.7656	0.0003309					-37.3047	0.00222841
											-34.5312	0.000351498					-37.1094	0.00233665
											-34.2969	0.000373378					-36.9141	0.00245013
											-34.0625	0.000396619					-36.7188	0.00256912
											-33.8281	0.000421306					-36.5234	0.00269387
											-33.5938	0.00044753					-36.3281	0.00282466
											-33.3594	0.000475385					-36.1328	0.00296178
											-33.125	0.000504972					-35.9375	0.00310554
											-32.8906	0.000536401					-35.7422	0.00325626
											-32.6562	0.000569784					-35.5469	0.00341426
											-32.4219	0.000605243					-35.3516	0.00357991
											-32.1875	0.000642908					-35.1562	0.00375356
											-31.9531	0.000682916					-34.9609	0.00393561
											-31.7188	0.000725411					-34.7656	0.00412645
											-31.4844	0.000770549					-34.5703	0.00432651
											-31.25	0.000818493					-34.375	0.00453622
											-31.0156	0.000869417					-34.1797	0.00475606
											-30.7812	0.000923508					-33.9844	0.0049865
											-30.5469	0.00098096					-33.7891	0.00522804
											-30.3125	0.00104198					-33.5938	0.00548123
											-30.0781	0.0011068					-33.3984	0.00574661
											-29.8438	0.00117564					-33.2031	0.00602476
											-29.6094	0.00124876					-33.0078	0.0063163
											-29.375	0.00132642					-32.8125	0.00662186
											-29.1406	0.0014089					-32.6172	0.0069421
											-28.9062	0.00149651					-32.4219	0.00727772
											-28.6719	0.00158955					-32.2266	0.00762945
											-28.4375	0.00168837					-32.0312	0.00799805
											-28.2031	0.00179332					-31.8359	0.00838431
											-27.9688	0.00190479					-31.6406	0.00878907
											-27.7344	0.00202317					-31.4453	0.0092132
											-27.5	0.00214889					-31.25	0.00965761
											-27.2656	0.0022824					-31.0547	0.0101232
											-27.0312	0.0024242					-30.8594	0.0106111
											-26.7969	0.00257477					-30.6641	0.0111222
											-26.5625	0.00273468					-30.4688	0.0116577
											-26.3281	0.00290449					-30.2734	0.0122186
											-26.0938	0.00308482					-30.0781	0.0128062
											-25.8594	0.0032763					-29.8828	0.0134217
											-25.625	0.00347963					-29.6875	0.0140664
											-25.3906	0.00369553					-29.4922	0.0147416
											-25.1562	0.00392478					-29.2969	0.0154488
											-24.9219	0.00416819					-29.1016	0.0161893
											-24.6875	0.00442663					-28.9062	0.0169648
											-24.4531	0.00470102					-28.7109	0.0177767
											-24.2188	0.00499235					-28.5156	0.0186269
											-23.9844	0.00530163					-28.3203	0.0195169
											-23.75	0.00562996					-28.125	0.0204486
											-23.5156	0.00597851					-27.9297	0.0214238
											-23.2812	0.00634851					-27.7344	0.0224446
											-23.0469	0.00674126					-27.5391	0.0235129
											-22.8125	0.00715813					-27.3438	0.0246309
											-22.5781	0.0076006					-27.1484	0.0258006
											-22.3438	0.00807019					-26.9531	0.0270245
											-22.1094	0.00856856					-26.7578	0.0283048
											-21.875	0.00909744					-26.5625	0.029644
											-21.6406	0.00965865					-26.3672	0.0310447
											-21.4062	0.0102541					-26.1719	0.0325095
											-21.1719	0.0108859					-25.9766	0.0340411
											-20.9375	0.0115562					-25.7812	0.0356423
											-20.7031	0.0122673					-25.5859	0.0373161
											-20.4688	0.0130216					-25.3906	0.0390655
											-20.2344	0.0138216					-25.1953	0.0408936
											-20	0.0146701					-25	0.0428037
											-19.7656	0.0155699					-24.8047	0.044799
											-19.5312	0.0165239					-24.6094	0.046883
											-19.2969	0.0175354					-24.4141	0.0490593
											-19.0625	0.0186077					-24.2188	0.0513315
											-18.8281	0.0197443					-24.0234	0.0537033
											-18.5938	0.0209489					-23.8281	0.0561786
											-18.3594	0.0222254					-23.6328	0.0587612
											-18.125	0.0235778					-23.4375	0.0614553
											-17.8906	0.0250105					-23.2422	0.064265
											-17.6562	0.026528					-23.0469	0.0671944
											-17.4219	0.028135					-22.8516	0.0702479
											-17.1875	0.0298365					-22.6562	0.0734299
											-16.9531	0.0316376					-22.4609	0.0767448
											-16.7188	0.0335438					-22.2656	0.0801971
											-16.4844	0.0355609					-22.0703	0.0837914
											-16.25	0.0376946					-21.875	0.0875323
											-16.0156	0.0399512					-21.6797	0.0914246
											-15.7812	0.0423372					-21.4844	0.0954729
											-15.5469	0.0448593					-21.2891	0.0996819
											-15.3125	0.0475244					-21.0938	0.104056
											-15.0781	0.0503399					-20.8984	0.108601
											-14.8438	0.0533131					-20.7031	0.11332
											-14.6094	0.0564518					-20.5078	0.118219
											-14.375	0.0597641					-20.3125	0.123303
											-14.1406	0.0632582					-20.1172	0.128574
											-13.9062	0.0669425					-19.9219	0.134039
											-13.6719	0.0708258					-19.7266	0.139701
											-13.4375	0.0749169					-19.5312	0.145564
											-13.2031	0.0792249					-19.3359	0.151633
											-12.9688	0.083759					-19.1406	0.157911
											-12.7344	0.0885286					-18.9453	0.164401
											-12.5	0.0935431					-18.75	0.171108
											-12.2656	0.0988119					-18.5547	0.178033
											-12.0312	0.104345					-18.3594	0.18518
											-11.7969	0.110151					-18.1641	0.192551
											-11.5625	0.11624					-17.9688	0.200148
											-11.3281	0.12262					-17.7734	0.207973
											-11.0938	0.129302					-17.5781	0.216026
											-10.8594	0.136294					-17.3828	0.224309
											-10.625	0.143603					-17.1875	0.232821
											-10.3906	0.151239					-16.9922	0.241562
											-10.1562	0.159208					-16.7969	0.250532
											-9.92188	0.167517					-16.6016	0.259728
											-9.6875	0.176173					-16.4062	0.26915
											-9.45312	0.185181					-16.2109	0.278793
											-9.21875	0.194545					-16.0156	0.288655
											-8.98438	0.204268					-15.8203	0.298732
											-8.75	0.214354					-15.625	0.309019
											-8.51562	0.224803					-15.4297	0.319511
											-8.28125	0.235615					-15.2344	0.330202
											-8.04688	0.246789					-15.0391	0.341084
											-7.8125	0.258321					-14.8438	0.352152
											-7.57812	0.270207					-14.6484	0.363395
											-7.34375	0.282442					-14.4531	0.374807
											-7.10938	0.295017					-14.2578	0.386377
											-6.875	0.307923					-14.0625	0.398096
											-6.64062	0.321148					-13.8672	0.409952
											-6.40625	0.33468					-13.6719	0.421935
											-6.17188	0.348504					-13.4766	0.434033
											-5.9375	0.362603					-13.2812	0.446234
											-5.70312	0.376959					-13.0859	0.458525
											-5.46875	0.391553					-12.8906	0.470893
											-5.23438	0.406363					-12.6953	0.483325
											-5	0.421366					-12.5	0.495806
											-4.76562	0.436539					-12.3047	0.508324
											-4.53125	0.451856					-12.1094	0.520865
											-4.29688	0.46729					-11.9141	0.533413
											-4.0625	0.482816					-11.7188	0.545955
											-3.82812	0.498404					-11.5234	0.558477
											-3.59375	0.514028					-11.3281	0.570965
											-3.35938	0.529658					-11.1328	0.583404
											-3.125	0.545265					-10.9375	0.595782
											-2.89062	0.560823					-10.7422	0.608084
											-2.65625	0.576301					-10.5469	0.620298
											-2.42188	0.591675					-10.3516	0.632411
											-2.1875	0.606915					-10.1562	0.644411
											-1.95312	0.621998					-9.96094	0.656285
											-1.71875	0.636898					-9.76562	0.668024
											-1.48438	0.651592					-9.57031	0.679615
											-1.25	0.666058					-9.375	0.691049
											-1.01562	0.680275					-9.17969	0.702317
											-0.78125	0.694225					-8.98438	0.713409
											-0.546875	0.707891					-8.78906	0.724317
											-0.3125	0.721256					-8.59375	0.735035
											-0.078125	0.734307					-8.39844	0.745554
											0.15625	0.747032					-8.20312	0.75587
											0.390625	0.759421					-8.00781	0.765976
											0.625	0.771465					-7.8125	0.775868
											0.859375	0.783158					-7.61719	0.785542
											1.09375	0.794493					-7.42188	0.794994
											1.32812	0.805469					-7.22656	0.804222
											1.5625	0.816081					-7.03125	0.813223
											1.79688	0.82633					-6.83594	0.821996
											2.03125	0.836217					-6.64062	0.83054
											2.26562	0.845742					-6.44531	0.838854
											2.5	0.85491					-6.25	0.846939
											2.73438	0.863724					-6.05469	0.854795
											2.96875	0.872189					-5.85938	0.862424
											3.20312	0.88031					-5.66406	0.869826
											3.4375	0.888095					-5.46875	0.877004
											3.67188	0.895551					-5.27344	0.88396
											3.90625	0.902684					-5.07812	0.890696
											4.14062	0.909504					-4.88281	0.897216
											4.375	0.91602					-4.6875	0.903523
											4.60938	0.922239					-4.49219	0.909621
											4.84375	0.928171					-4.29688	0.915512
											5.07812	0.933826					-4.10156	0.921202
											5.3125	0.939212					-3.90625	0.926693
											5.54688	0.94434					-3.71094	0.931992
											5.78125	0.949219					-3.51562	0.9371
											6.01562	0.953858					-3.32031	0.942025
											6.25	0.958267					-3.125	0.946769
											6.48438	0.962454					-2.92969	0.951337
											6.71875	0.96643					-2.73438	0.955735
											6.95312	0.970203					-2.53906	0.959966
											7.1875	0.973782					-2.34375	0.964037
											7.42188	0.977175					-2.14844	0.96795
											7.65625	0.980391					-1.95312	0.971712
											7.89062	0.983438					-1.75781	0.975326
											8.125	0.986323					-1.5625	0.978798
											8.35938	0.989055					-1.36719	0.982131
											8.59375	0.991641					-1.17188	0.985331
											8.82812	0.994087					-0.976562	0.988402
											9.0625	0.996401					-0.78125	0.991349
											9.29688	0.99859					-0.585938	0.994175
											9.53125	1.00066					-0.390625	0.996884
											9.76562	1.00261					-0.195312	0.999482
											10	1.00446					0	1.00197

## Sheet: Figure 3D
Membrane pot	Normcurrentaverage (WT)	DE	Parameters(wt)	Predicted	Residuals	x column	y column		M pot	Normcurrentaverage (G1518R)	DE	Parameters (G1518R)	Predicted 1	Residuals 1	x column 1	y column 1
-90	1		0.934026	0.998043	0.00195699	-90	0.998043		-90	1		0.934723	1.02305	-0.0230458	-90	1.02305
-80	1	0.05	-8.21428	0.96853	0.0314701	-89.5703	0.997355		-80	1	0.05	-9.35245	1.00511	-0.00511165	-89.5703	1.0226
-70	0.8223	0.067	-55.0032	0.881446	-0.0591459	-89.1406	0.996631		-70	0.9823	0.02	-47.3346	0.956618	0.0256817	-89.1406	1.02213
-60	0.7123	0.037	0.0770179	0.68185	0.0304502	-88.7109	0.99587		-60	0.8623	0.0683	0.0979818	0.840919	0.0213806	-88.7109	1.02164
-50	0.4145	0.032		0.406045	0.00845547	-88.2812	0.995069		-50	0.6145	0.052		0.631494	-0.0169941	-88.2812	1.02112
-40	0.18	0.078		0.206528	-0.0265281	-87.8516	0.994227		-40	0.36	0.0988		0.39093	-0.0309296	-87.8516	1.02058
-30	0.1134	0.0563		0.1195	-0.00609994	-87.4219	0.993341		-30	0.2634	0.06		0.224604	0.0387965	-87.4219	1.02002
-20	0.104	0.06		0.0900086	0.0139914	-86.9922	0.992409		-20	0.1724	0.0931		0.145692	0.0267084	-86.9922	1.01943
-10	0.089	0.0582		0.0809011	0.00809885	-86.5625	0.991429		-10	0.121	0.096		0.114927	0.00607288	-86.5625	1.01882
0	0.082	0.012		0.0781707	0.00382931	-86.1328	0.990399		0	0.085	0.012		0.103869	-0.0188687	-86.1328	1.01818
10	0.072	0.069		0.0773594	-0.0053594	-85.7031	0.989316		10	0.089	0.12		0.100011	-0.011011	-85.7031	1.0175
20	0.076	0.045		0.077119	-0.00111898	-85.2734	0.988178		20	0.086	0.045		0.0986793	-0.0126793	-85.2734	1.0168
						-84.8438	0.986982								-84.8438	1.01607
						-84.4141	0.985724								-84.4141	1.0153
						-83.9844	0.984403								-83.9844	1.0145
						-83.5547	0.983016								-83.5547	1.01366
						-83.125	0.981558								-83.125	1.01278
						-82.6953	0.980027								-82.6953	1.01187
						-82.2656	0.97842								-82.2656	1.01091
						-81.8359	0.976732								-81.8359	1.00991
						-81.4062	0.974961								-81.4062	1.00887
						-80.9766	0.973102								-80.9766	1.00777
						-80.5469	0.971151								-80.5469	1.00664
						-80.1172	0.969105								-80.1172	1.00545
						-79.6875	0.966959								-79.6875	1.0042
						-79.2578	0.964709								-79.2578	1.00291
						-78.8281	0.962351								-78.8281	1.00155
						-78.3984	0.959879								-78.3984	1.00014
						-77.9688	0.957289								-77.9688	0.998662
						-77.5391	0.954577								-77.5391	0.997122
						-77.1094	0.951737								-77.1094	0.995516
						-76.6797	0.948765								-76.6797	0.99384
						-76.25	0.945654								-76.25	0.992092
						-75.8203	0.942401								-75.8203	0.990269
						-75.3906	0.938999								-75.3906	0.988369
						-74.9609	0.935443								-74.9609	0.986388
						-74.5312	0.931728								-74.5312	0.984323
						-74.1016	0.927848								-74.1016	0.982171
						-73.6719	0.923798								-73.6719	0.979929
						-73.2422	0.919571								-73.2422	0.977594
						-72.8125	0.915163								-72.8125	0.975163
						-72.3828	0.910568								-72.3828	0.972631
						-71.9531	0.90578								-71.9531	0.969996
						-71.5234	0.900795								-71.5234	0.967255
						-71.0938	0.895606								-71.0938	0.964402
						-70.6641	0.890209								-70.6641	0.961436
						-70.2344	0.884598								-70.2344	0.958352
						-69.8047	0.878769								-69.8047	0.955146
						-69.375	0.872718								-69.375	0.951815
						-68.9453	0.866439								-68.9453	0.948355
						-68.5156	0.85993								-68.5156	0.944762
						-68.0859	0.853187								-68.0859	0.941033
						-67.6562	0.846205								-67.6562	0.937164
						-67.2266	0.838984								-67.2266	0.93315
						-66.7969	0.83152								-66.7969	0.928989
						-66.3672	0.823812								-66.3672	0.924676
						-65.9375	0.815858								-65.9375	0.920209
						-65.5078	0.807659								-65.5078	0.915582
						-65.0781	0.799213								-65.0781	0.910794
						-64.6484	0.790523								-64.6484	0.90584
						-64.2188	0.78159								-64.2188	0.900718
						-63.7891	0.772416								-63.7891	0.895424
						-63.3594	0.763005								-63.3594	0.889955
						-62.9297	0.753359								-62.9297	0.884309
						-62.5	0.743485								-62.5	0.878483
						-62.0703	0.733388								-62.0703	0.872475
						-61.6406	0.723074								-61.6406	0.866283
						-61.2109	0.712552								-61.2109	0.859905
						-60.7812	0.701829								-60.7812	0.85334
						-60.3516	0.690915								-60.3516	0.846586
						-59.9219	0.67982								-59.9219	0.839643
						-59.4922	0.668554								-59.4922	0.83251
						-59.0625	0.657131								-59.0625	0.825187
						-58.6328	0.645562								-58.6328	0.817675
						-58.2031	0.633861								-58.2031	0.809974
						-57.7734	0.622041								-57.7734	0.802086
						-57.3438	0.610118								-57.3438	0.794012
						-56.9141	0.598106								-56.9141	0.785755
						-56.4844	0.586022								-56.4844	0.777317
						-56.0547	0.57388								-56.0547	0.768701
						-55.625	0.561698								-55.625	0.759911
						-55.1953	0.549491								-55.1953	0.750951
						-54.7656	0.537277								-54.7656	0.741827
						-54.3359	0.525072								-54.3359	0.732543
						-53.9062	0.512894								-53.9062	0.723105
						-53.4766	0.500757								-53.4766	0.713519
						-53.0469	0.488679								-53.0469	0.703793
						-52.6172	0.476676								-52.6172	0.693934
						-52.1875	0.464763								-52.1875	0.683949
						-51.7578	0.452956								-51.7578	0.673847
						-51.3281	0.441268								-51.3281	0.663637
						-50.8984	0.429714								-50.8984	0.653328
						-50.4688	0.418306								-50.4688	0.642929
						-50.0391	0.407059								-50.0391	0.63245
						-49.6094	0.395982								-49.6094	0.621902
						-49.1797	0.385088								-49.1797	0.611296
						-48.75	0.374386								-48.75	0.600641
						-48.3203	0.363885								-48.3203	0.58995
						-47.8906	0.353594								-47.8906	0.579232
						-47.4609	0.34352								-47.4609	0.5685
						-47.0312	0.33367								-47.0312	0.557765
						-46.6016	0.324049								-46.6016	0.547037
						-46.1719	0.314662								-46.1719	0.536329
						-45.7422	0.305514								-45.7422	0.525651
						-45.3125	0.296606								-45.3125	0.515015
						-44.8828	0.287942								-44.8828	0.504431
						-44.4531	0.279523								-44.4531	0.493911
						-44.0234	0.27135								-44.0234	0.483464
						-43.5938	0.263422								-43.5938	0.473101
						-43.1641	0.25574								-43.1641	0.462831
						-42.7344	0.248301								-42.7344	0.452665
						-42.3047	0.241106								-42.3047	0.44261
						-41.875	0.23415								-41.875	0.432676
						-41.4453	0.227431								-41.4453	0.42287
						-41.0156	0.220946								-41.0156	0.413201
						-40.5859	0.214692								-40.5859	0.403676
						-40.1562	0.208665								-40.1562	0.3943
						-39.7266	0.202859								-39.7266	0.385081
						-39.2969	0.197271								-39.2969	0.376024
						-38.8672	0.191896								-38.8672	0.367134
						-38.4375	0.186729								-38.4375	0.358415
						-38.0078	0.181765								-38.0078	0.349872
						-37.5781	0.176998								-37.5781	0.341508
						-37.1484	0.172423								-37.1484	0.333326
						-36.7188	0.168034								-36.7188	0.325328
						-36.2891	0.163827								-36.2891	0.317517
						-35.8594	0.159795								-35.8594	0.309894
						-35.4297	0.155932								-35.4297	0.30246
						-35	0.152234								-35	0.295215
						-34.5703	0.148695								-34.5703	0.288161
						-34.1406	0.145309								-34.1406	0.281296
						-33.7109	0.142071								-33.7109	0.27462
						-33.2812	0.138976								-33.2812	0.268132
						-32.8516	0.136017								-32.8516	0.26183
						-32.4219	0.133191								-32.4219	0.255714
						-31.9922	0.130492								-31.9922	0.249782
						-31.5625	0.127915								-31.5625	0.24403
						-31.1328	0.125456								-31.1328	0.238458
						-30.7031	0.123109								-30.7031	0.233061
						-30.2734	0.12087								-30.2734	0.227838
						-29.8438	0.118735								-29.8438	0.222786
						-29.4141	0.116699								-29.4141	0.2179
						-28.9844	0.114759								-28.9844	0.213179
						-28.5547	0.112909								-28.5547	0.208619
						-28.125	0.111147								-28.125	0.204215
						-27.6953	0.109468								-27.6953	0.199965
						-27.2656	0.107869								-27.2656	0.195865
						-26.8359	0.106346								-26.8359	0.191912
						-26.4062	0.104896								-26.4062	0.1881
						-25.9766	0.103515								-25.9766	0.184428
						-25.5469	0.102201								-25.5469	0.18089
						-25.1172	0.100951								-25.1172	0.177484
						-24.6875	0.0997605								-24.6875	0.174205
						-24.2578	0.0986282								-24.2578	0.17105
						-23.8281	0.0975511								-23.8281	0.168015
						-23.3984	0.0965265								-23.3984	0.165096
						-22.9688	0.0955519								-22.9688	0.162289
						-22.5391	0.0946251								-22.5391	0.159592
						-22.1094	0.0937439								-22.1094	0.157
						-21.6797	0.0929059								-21.6797	0.15451
						-21.25	0.0921093								-21.25	0.152119
						-20.8203	0.0913519								-20.8203	0.149823
						-20.3906	0.090632								-20.3906	0.147618
						-19.9609	0.0899478								-19.9609	0.145503
						-19.5312	0.0892975								-19.5312	0.143473
						-19.1016	0.0886795								-19.1016	0.141525
						-18.6719	0.0880922								-18.6719	0.139657
						-18.2422	0.0875341								-18.2422	0.137866
						-17.8125	0.0870039								-17.8125	0.136148
						-17.3828	0.0865001								-17.3828	0.134501
						-16.9531	0.0860215								-16.9531	0.132922
						-16.5234	0.0855668								-16.5234	0.131409
						-16.0938	0.0851349								-16.0938	0.12996
						-15.6641	0.0847246								-15.6641	0.128571
						-15.2344	0.0843349								-15.2344	0.12724
						-14.8047	0.0839648								-14.8047	0.125966
						-14.375	0.0836133								-14.375	0.124745
						-13.9453	0.0832794								-13.9453	0.123576
						-13.5156	0.0829623								-13.5156	0.122457
						-13.0859	0.0826612								-13.0859	0.121385
						-12.6562	0.0823752								-12.6562	0.12036
						-12.2266	0.0821036								-12.2266	0.119378
						-11.7969	0.0818458								-11.7969	0.118438
						-11.3672	0.0816009								-11.3672	0.117539
						-10.9375	0.0813684								-10.9375	0.116678
						-10.5078	0.0811477								-10.5078	0.115855
						-10.0781	0.0809381								-10.0781	0.115067
						-9.64844	0.0807391								-9.64844	0.114313
						-9.21875	0.0805502								-9.21875	0.113592
						-8.78906	0.0803708								-8.78906	0.112902
						-8.35938	0.0802005								-8.35938	0.112242
						-7.92969	0.0800388								-7.92969	0.111611
						-7.5	0.0798853								-7.5	0.111008
						-7.07031	0.0797396								-7.07031	0.110431
						-6.64062	0.0796013								-6.64062	0.109879
						-6.21094	0.07947								-6.21094	0.109351
						-5.78125	0.0793453								-5.78125	0.108846
						-5.35156	0.079227								-5.35156	0.108364
						-4.92188	0.0791146								-4.92188	0.107903
						-4.49219	0.079008								-4.49219	0.107462
						-4.0625	0.0789068								-4.0625	0.10704
						-3.63281	0.0788107								-3.63281	0.106637
						-3.20312	0.0787195								-3.20312	0.106252
						-2.77344	0.0786329								-2.77344	0.105884
						-2.34375	0.0785507								-2.34375	0.105532
						-1.91406	0.0784727								-1.91406	0.105195
						-1.48438	0.0783987								-1.48438	0.104874
						-1.05469	0.0783284								-1.05469	0.104566
						-0.625	0.0782617								-0.625	0.104273
						-0.195312	0.0781984								-0.195312	0.103992
						0.234375	0.0781383								0.234375	0.103724
						0.664062	0.0780813								0.664062	0.103468
						1.09375	0.0780271								1.09375	0.103223
						1.52344	0.0779757								1.52344	0.102989
						1.95312	0.077927								1.95312	0.102765
						2.38281	0.0778807								2.38281	0.102551
						2.8125	0.0778367								2.8125	0.102347
						3.24219	0.077795								3.24219	0.102152
						3.67188	0.0777555								3.67188	0.101965
						4.10156	0.0777179								4.10156	0.101787
						4.53125	0.0776823								4.53125	0.101617
						4.96094	0.0776484								4.96094	0.101454
						5.39062	0.0776163								5.39062	0.101299
						5.82031	0.0775858								5.82031	0.10115
						6.25	0.0775569								6.25	0.101009
						6.67969	0.0775294								6.67969	0.100873
						7.10938	0.0775034								7.10938	0.100744
						7.53906	0.0774786								7.53906	0.10062
						7.96875	0.0774552								7.96875	0.100502
						8.39844	0.0774329								8.39844	0.100389
						8.82812	0.0774117								8.82812	0.100281
						9.25781	0.0773917								9.25781	0.100178
						9.6875	0.0773726								9.6875	0.10008
						10.1172	0.0773546								10.1172	0.0999857
						10.5469	0.0773374								10.5469	0.0998959
						10.9766	0.0773211								10.9766	0.0998101
						11.4062	0.0773057								11.4062	0.0997282
						11.8359	0.077291								11.8359	0.0996499
						12.2656	0.0772771								12.2656	0.0995751
						12.6953	0.0772639								12.6953	0.0995037
						13.125	0.0772514								13.125	0.0994355
						13.5547	0.0772395								13.5547	0.0993703
						13.9844	0.0772282								13.9844	0.099308
						14.4141	0.0772174								14.4141	0.0992485
						14.8438	0.0772073								14.8438	0.0991917
						15.2734	0.0771976								15.2734	0.0991375
						15.7031	0.0771885								15.7031	0.0990856
						16.1328	0.0771798								16.1328	0.0990361
						16.5625	0.0771715								16.5625	0.0989888
						16.9922	0.0771637								16.9922	0.0989437
						17.4219	0.0771563								17.4219	0.0989005
						17.8516	0.0771492								17.8516	0.0988593
						18.2812	0.0771425								18.2812	0.0988199
						18.7109	0.0771362								18.7109	0.0987823
						19.1406	0.0771301								19.1406	0.0987464
						19.5703	0.0771244								19.5703	0.0987121
						20	0.077119								20	0.0986793
