# Supplementary material for: Gain-of-function mutations in the UNC-2/CaV2α channel lead to excitation-dominant synaptic transmission in Caenorhabditis elegans
Source: eLife journal article supplement (doi:10.7554/elife.45905), 2019-07-31
Supplement: supp [file elife-45905-supp-v2.zip › elife_poa_e45905_Figure_4_source_data_1.xlsx]

## Sheet: Figure 4B
Numbers of Revesals in 90 sec on thin lawn OP50
wild type	unc-2(zf35gf)	Ptag168::UNC-2 R192Q; unc-2(lf)	Ptag168::UNC-2 S218L; unc-2(lf)
3	33	25	18
8	39	31	21
6	31	19	12
7	38	22	13
1	28	39	10
7	23	20	13
8	42	20	12
7	28	27	14
5	27	28	11
4	20	29	14
3	24	35	13
2	29	22	20
2	29	20	18
8	33	27	14
7	31	32	10
2	31	28	15
8	31	27	10
3	35	34	8
7	30	25	22
3	24	23	19
3		25	33
2		22	16
1		34	14
4		32	20
4		15	18
2		20	28
0		28	27
5		25	16
2		22	19
		25	17
		25	15
		25	16
		15	20
		21

## Sheet: Figure 4C
Numbers of unlaid eggs in uterus
wild type	unc-2(zf35gf)	Ptag168::UNC-2 R192Q; unc-2(lf)	Ptag168::UNC-2 S218L; unc-2(lf)
14	2	4	6
8	3	5	6
12	2	4	8
25	4	4	6
22	2	4	11
20	3	4	3
16	4	6	10
14	2	6	7
21	2	5	9
17	2	4	6
17	3	7	11
18	2	4	7
15	3	15	5
20	3	9	12
16	3	4	6
10	1	9	5
16	4	6	5
11	3	6	12
18	3	3	5
19	2	5	11
20	3	6	6
15	2	6	5
15	5	6	16
	4	7	11
	3	6	14
	3	5	7
	5	2	8
	2	6	7
	3	6	6
	2	8	12
	2	5	11
	2	5	16
	1	3
	3	5
	3	6
		10
		5

## Sheet: Figure 4D
% of paralzed animals of total animals tested on the plate
Time (min)	wild type			unc-2(lf)			unc-2(zf35gf)			unc-2(zf35gf)/+
0	0	0	0	0	0	0	0	0	0	0	0	0
15	0	0	0	2.5	0	0	24	30	56.25	5	8	10
30	2.3	4.6	0	5	2.5	0	94.5	92.5	100	20	35	40
45	9.3	7	12.5	7.5	5	6	100	100	100	60	75	80
60	42	37	56.25	15	12.5	12	100	100	100	90	100	100
75	70	53.5	87.5	37.5	25	50	100	100	100	100	100	100
90	91	80	93.75	50	47.5	60	100	100	100	100	100	100
105	95.3	91	93.75	65	85	75	100	100	100	100	100	100
120	100	100	100	77.5	95	100	100	100	100	100	100	100
135	100	100	100	100	100	100	100	100	100	100	100	100
150	100	100	100	100	100	100	100	100	100	100	100	100

## Sheet: Figure 4E
% of animals paralyzed at 60 min
	wild type	Ptag-168::UNC-2(WT)	Ptag-168::UNC-2(GF)	unc-2(lf)	Ptag-168::UNC-2(WT);unc-2(lf)	Ptag-168::UNC-2(GF); unc-2(lf)	Ptag-168::UNC-2(R192Q); unc-2(lf)	Ptag-168::UNC-2(S218L); unc-2(lf)
	42	53.3333	100	15	60	100	100	100
	37	60	100	12.5	54.5455	100	100	100
	70		100	5	50	100	100	100
	55		93.3333	25		100
	65			69.2308
	36.8421			40
	65
	70
	59.0909
