# Supplementary material for: Gain-of-function mutations in the UNC-2/CaV2α channel lead to excitation-dominant synaptic transmission in Caenorhabditis elegans
Source: eLife journal article supplement (doi:10.7554/elife.45905), 2019-07-31
Supplement: supp [file elife-45905-supp-v2.zip › elife_poa_e45905_Figure_5_source_data_1.xlsx]

## Sheet: Figure 5B and C
WT(N2)	minis#	Time(s)	Freq(Hz)	Mean(pA)			unc-2(zf35gf)	minis#	Time(s)	Freq(Hz)	Mean(pA)
11419030_2_10-20s.abf	483	10	48.3	-14.4157			12102001_5-10s	422	5	84.4
11426004_2_0-10s.abf	670	10	67	-18.7658			12102006_5-10s	297	5	59.4
11914029_0.5-5.5s.abf	462	5	92.4	-17.8098			12102008_0-5s	471	5	94.2
11921037_15-20s.abf	236	5	47.2	-19.7792			12102012_86-91s	398	5	79.6
11926003_0-5s.abf	317	5	63.4	-20.4995			12103010_35-40s	470	5	94
							12104001_5-10s	281	5	56.2
							12104004_47-52s	803	5	160.6
							12104005_0-5s	539	5	107.8
11930015_0-5s.abf	144	5	28.8	-21.1001			12104012_7-12s	465	5	93
11o06005_3-13s	221	10	22.1	-29.9016
		n=8	52.7429	-20.3245					n=9	92.1333	#DIV/0!
			9.06621	1.80157						10.2206	#DIV/0!

## Sheet: Figure 5E and F
unc-49(e407) recordings:				unc-49(e407);unc-2(zf35gf) recordings
Recording	Freq(Hz)	Amplitude(pA)		Recording	Freq(Hz)	Amplitude(pA)
15810001	16.13	-13.5955		15810003	64.62	-14.77
15811001	37.28	-13.6633		15814003	33.28	-11.163
15814005	29.17	-12.5182		15814007	31.45	-8.07803
15814008	12.88	-13.1969		15814009	64.33	-19.67
15814013	27.7	-11.6123		15826003	42.78	-25.1103
15826005	20.98	-10.6814		15827002	37.23	-11.887
15825000	24.25	-13.859		15827006	41.473	-10.564
15827004	18.36	-13.085

## Sheet: Figure 5H and I
parameter	WT(N2) -10 mV	minis#	Time(s)	Freq(Hz)	Mean(pA)		unc-2(zf35gf)	minis#	Time(s)	Freq(Hz)	Mean(pA)
5 pA	12130002.abf	105	20	5.25	12.1355		14331000_1_15-20s	169	5	33.8	13.6394
	12130011_1.abf	1005	20	50.25	15.4439		14331004_3	180	20	9	13.2447
	12130035_2.abf	851	20	42.55	19.9147		14331005_2	220	20	11	12.9648
	12131001_1.abf	919	20	45.95	13.8461		14331007_3	100	20	5	13.4822
	12131006_1.abf	81	20	4.05	11.0018		14331010_2	30	20	1.5	10.7725
	12131020_2.abf	754	20	37.7	14.84		14331011_3	137	20	6.85	12.2121
	12131030_.abf	323	20	16.15	10.6854		14331013_5	71	20	3.55	10.4457
	12201023_4.abf	98	20	4.9	10.2267
	12o02002_1	302	20	15.1	12.7969
	12o04029_1	228	20	11.4	13.4682
	12o09016_1	742	20	37.1	9.32301				n=7	10.1	12.3945
	12o09020_1	422	20	21.1	13.1989					4.13218	0.493841
	12o18015_1	343	20	17.15	10.5804
			n=13	23.7423	12.8817
				4.62899	0.78106
