# Supplementary material for: Gain-of-function mutations in the UNC-2/CaV2α channel lead to excitation-dominant synaptic transmission in Caenorhabditis elegans
Source: eLife journal article supplement (doi:10.7554/elife.45905), 2019-07-31
Supplement: supp [file elife-45905-supp-v2.zip › elife_poa_e45905_Figure_6_figure_supplement_1_source_data_1.xlsx]

## Sheet: Figure 6-figure supplement 1A
Levamisole	% of the paralyzed animals on the test plates
time	wild type			unc-2(zf35gf)
0	0	0	0	0	0	0
15	6.7	0	8.3	16.67	23.52	0
30	26.67	13.3	33.3	94.4	76.47	86
45	40	33.3	50	100	100	100
60	73.3	73.3	83.3	100	100	100
75	93.3	100	100	100	100	100
90	100	100	100	100	100	100
105	100	100	100	100	100	100
120	100	100	100	100	100	100

## Sheet: Figure 6-figure supplement 1B
	% of animals in each category after treating with muscimol for 60 min
	0			1			2			3			4
wild type	0	0	0	0	5.7	4	14.28	13.46	24	59	63.46	64	36	17.32	44
unc-2(zf35gf)	9	17	12	34	30.76	36	28	23	28	31	25	20	3	2	4
