# Supplementary material for: Gain-of-function mutations in the UNC-2/CaV2α channel lead to excitation-dominant synaptic transmission in Caenorhabditis elegans
Source: eLife journal article supplement (doi:10.7554/elife.45905), 2019-07-31
Supplement: supp [file elife-45905-supp-v2.zip › elife_poa_e45905_Figure_6_figure_supplement_2_source_data_1.xlsx]

## Sheet: Figure 6-figure supplement 2
RAB-3 Puncta number / 50 µm				GABA receptor Puncta number / 50 µm
wild type	unc-2(zf35gf)			wild type	unc-2(zf35gf)
23	24			13	4
22	29			15	13
21	29			22	15
20	24			18	13
16	23			13	2
15	19			15	10
17	24			11	10
14	25			6	15
19	22			19	11
20	24			23	9
20	22			20	16
20	20			22	2
21	24			9	10
22	23			19	10
21	24			20	1
24	22			12	1
18	26			1	3
22	22			6	5
21	23			13	1
17	27			13	1
22	21			12	0
25	19			11	13
17	21			10	1
23	22			21	6
20	21			16	12
14	24			13	2
20				15
