# Supplementary material for: Gain-of-function mutations in the UNC-2/CaV2α channel lead to excitation-dominant synaptic transmission in Caenorhabditis elegans
Source: eLife journal article supplement (doi:10.7554/elife.45905), 2019-07-31
Supplement: supp [file elife-45905-supp-v2.zip › elife_poa_e45905_Figure_6_figure_supplement_4_source_data_1.xlsx]

## Sheet: Figure 6-figure supplement 4
(TPM)	CDS_name	n2_replicate1	n2_replicate2	n2_replicate3	unc2_replicate1	unc2_replicate2	unc2_replicate3
	rab-3	21.5286	18.7409	10.0897	15.1721	14.152	15.6021
	rgef-1	3.65545	3.3598	1.49629	2.56741	2.14217	2.67869
	unc-2	11.4538	4.84001	3.50634	4.54745	6.42592	4.03509
	unc-29	3.7284	2.67875	2.36064	3.41186	3.92287	4.8154
	unc-49	19.0873	13.9307	9.54082	16.9616	16.3545	20.6965
	myo-3	53.34	28.0899	28	32.3292	30.685	37.7774
