# Supplementary material for: Gain-of-function mutations in the UNC-2/CaV2α channel lead to excitation-dominant synaptic transmission in Caenorhabditis elegans
Source: eLife journal article supplement (doi:10.7554/elife.45905), 2019-07-31
Supplement: supp [file elife-45905-supp-v2.zip › elife_poa_e45905_Figure_6_source_data_1.xlsx]

## Sheet: Figure 6B
Pacr-2::RAB-3mcherry in Relative fluorescence intensity (% of wild type mean)
wild type	unc-2(zf35gf)
80.1485	192.214
158.688	139.893
49.2009	194.12
99.8306	146.948
118.892	57.1112
83.0693	77.0341
104.854	98.3994
65.3308	131.354
130.281	88.3125
135.745	127.209
68.3311	155.599
99.2226	128.216
66.2367
159.759
107.594
118.119
94.3073
92.1052
59.4488

## Sheet: Figure 6D
Punc-29::UNC-29::GFP in Relative fluorescence intensity (% of wild type mean)
wild type	unc-2(zf35gf)
103.322	72.3683
107.277	125.557
102.262	68.2946
115.998	102.124
81.7392	99.4062
130.375	93.2865
128.065	126.977
96.6649	215.411
87.7665	168.018
65.54	202.486
91.5885	203.691
99.6268	139.108
143.536	109.417
88.7779	110.392
155.93	110.521
37.3619	77.4055
74.7673	159.083
	160.078
	95.623
	88.8977
	112.625
	114.328

## Sheet: Figure 6F
Punc-47::RAB-3::mcherry in Relative fluorescence intensity (% of wild type mean)
wild type	unc-2(zf35gf)
106.876	139.964
141.783	153.014
67.0943	149.314
84.5259	124.683
99.7208	184.514
109.065	201.084
109.616	150.354
95.3999	145.939
85.9196	130.473
107.086	72.5584
64.8266	215.245
118.708	119.762
110.191	165.465
99.1878	123.917
99.0001	175.659
94.3423	95.7912
94.5817	127.364
112.076	119.395
	190.904
	87.066

## Sheet: Figure 6H
Punc-49::UNC-49::GFP in Relative fluorescence intensity (% of wild type mean)
wild type	unc-2(zf35gf)
62.6375	35.0809
110.414	66.6819
186.622	87.3177
83.4523	11.4506
56.8751	16.8906
113.515	38.5918
122.992	57.1494
86.9389	20.4631
76.555	39.1416
40.7348	25.3062
187.003	90.5256
113.84	34.5234
90.6722	20.4925
67.7504	73.6715
96.1806	30.5251
68.9838	42.917
128.197	82.1114
106.638	95.3752
	96.5738
	15.7124
