# Supplementary material for: Gain-of-function mutations in the UNC-2/CaV2α channel lead to excitation-dominant synaptic transmission in Caenorhabditis elegans
Source: eLife journal article supplement (doi:10.7554/elife.45905), 2019-07-31
Supplement: supp [file elife-45905-supp-v2.zip › elife_poa_e45905_Figure_7_figure_supplement_1_source_data_1.xlsx]

## Sheet: Figure 7-figure supplement 1
Punc-47::RAB-3mcherry
wild type	unc-2(zf35gf)	PGABA::unc-2(zf35gf)	PACh::unc-2(zf35gf)	acr-12; unc-2(zf35gf)	unc-29;unc-2(zf35gf)
1.06876	1.39964	0.702191	0.816064	1.73929	1.12019
1.41783	1.53014	1.28368	1.10088	1.35284	1.36923
0.670943	1.49314	0.898986	1.10499	0.997955	1.87154
0.845259	1.24683	0.930868	1.23537	1.14848	1.27812
0.997208	1.84514	1.52283	1.00048	1.30793	0.803599
1.09065	2.01084	1.5653	1.35445	0.881291	1.03794
1.09616	1.50354	1.19906	1.53077	1.26973	1.3701
0.953999	1.45939	1.57392	1.48841	1.18976	1.53168
0.859196	1.30473	1.34462	0.640142	1.09294	1.3947
1.07086	0.725584	1.25093	1.48928	0.848794	1.33692
0.648266	2.15245	1.65409	1.22175	0.966304	0.605321
1.18708	1.19762	1.67547	1.35958	1.44431	1.07236
1.10191	1.65465	1.34914	0.72961	1.33046	0.847143
0.991878	1.23917	0.895829	1.65937	1.53449	1.06299
0.807804	1.75659		1.22053	1.13338
1.28167	0.957912		1.36457
0.910526	1.27364
1	1.19395
0.686406	1.90904
0.910527	0.87066
1.36249
1.16638
0.874197
0.993067
1.00693
1.09636
0.867233
1.03641
1.08011
0.760796
0.874384
1.28471
1.16699
1.14576
0.82387
0.863378
1.08289
1.03487
1.10889
1.1017
0.82358
0.84807
0.990001
0.943423
0.945817
1.12076
0.774682
0.978368
1.32095
0.683086
1.24291
