# Supplementary material for: Gain-of-function mutations in the UNC-2/CaV2α channel lead to excitation-dominant synaptic transmission in Caenorhabditis elegans
Source: eLife journal article supplement (doi:10.7554/elife.45905), 2019-07-31
Supplement: supp [file elife-45905-supp-v2.zip › elife_poa_e45905_Figure_7_figure_supplement_2_source_data_1.xlsx]

## Sheet: Figure 7-figure supplement 2
Aldicard-induced Paralysis (%)
time(min)	wild type					Punc-47::UNC-2GF					Pacr-2::UNC2GF
0	0	0	0	0	0	0	0	0	0	0	0	0	0	0	0
15	0	0	0	0	0	0	0	0	0	0	0	0	0	0	0
30	0	0	0	0	5.9	0	0	0	0	0	0	0	0	0	0
45	0	10.5	0	5	5.9	0	0	0	0	0	13.3	8.3	0	27.7	15.3
60	36.4	35	7.7	35	66.7	0	20	31.25	11.1	7.1	60	75	55	55.5	53.8
75	72.7	80	53.8	85.5	93.3	38.5	53.3	62.5	66.7	35.7	93.3	100	85	100	92.3
90	100	100	92.33	95	100	85	100	100	100	85.7	100	100	100	100	92.3
105	100	100	100	100	100	92.3	100	100	100	100	100	100	100	100	100
120	100	100	100	100	100	100	100	100	100	100	100	100	100	100	100
