# Supplementary material for: Gain-of-function mutations in the UNC-2/CaV2α channel lead to excitation-dominant synaptic transmission in Caenorhabditis elegans
Source: eLife journal article supplement (doi:10.7554/elife.45905), 2019-07-31
Supplement: supp [file elife-45905-supp-v2.zip › elife_poa_e45905_Figure_7_source_data_1.xlsx]

## Sheet: Figure 7B
Punc-49::UNC-49GFP
wild type	unc-2(zf35gf)	Punc-47::unc-2(zf35gf)	Pacr-2::unc-2(zf35gf)	acr-12; unc-2(zf35gf)	unc-29;unc-2(zf35gf)
0.626375	0.350809	1.01261	1.21474	0.98568	0.934231
1.10414	0.666819	1.51781	1.28438	1.13043	0.861536
1.86622	0.873177	1.28419	0.637769	0.231908	0.936628
0.834523	0.114506	1.81933	0.61111	0.856002	0.259002
0.568751	0.168906	1.76609	0.584732	1.33322	1.28208
1.13515	0.385918	1.34056	0.747054	1.36513	0.607114
1.22992	0.571494	1.78724	0.879312	1.26758	0.659288
0.869389	0.204631	1.69937	1.13559	0.615176	0.872034
0.76555	0.391416	1.93972	0.536151	1.00047	1.25269
0.407348	0.253062	2.33112	0.787576	0.580185	1.14461
1.87003	0.905256	1.4801	0.700859	1.54833	1.05419
1.1384	0.345234	0.836332	0.831201	0.57811	0.963211
0.906722	0.204925	0.85994	0.569574	1.86033	0.868402
0.677504	0.736715		0.432632	1.28801	0.956257
0.518002	0.305251		0.44534	0.492061
1.04311	0.788606		0.23913
1.43889	0.176911
0.47617	0.509745
1.52383	0.806597
0.759561	0.398801
1.01797	1.04947
1.63252	0.443778
1.11794	0.770615
0.472009	0.827586
1
1.19142
0.891095
0.917486
1.22119
0.922694
0.856118
0.95628
0.644094
1.05516
1.34447
1.17391
0.425434
0.865766
1.89682
0.596271
1.0418
0.961806
0.689838
1.28197
1.06638
0.866767
1.19873
1.1462
0.642485
1.14581

## Sheet: Figure 7D
Punc-49::UNC-49GFP
wild type	L-AChR(wt)	L-AChR(gf)	unc-2(zf35gf)	tax-6	tax-6;unc-2(zf35gf)
0.793133	1.03154	0.710515	1.14736	1.00594	0.899174
1.19442	1.08348	0.634979	1.13048	1.52819	1.18347
0.814378	0.913519	0.590129	1.28609	1.71217	1.07438
1.1779	0.885193	0.771888	0.725534	1.54006	1.16364
1.23927	0.852146	0.722318	0.721785	0.995501	1.34876
1.13777	0.623176	0.958369	1.47731	1.66104	1.0281
0.998498	0.986695	0.554721	2.07349	1.48856	1.53388
0.769528	0.837983	0.762446	1.14548	1.56543	1.26942
0.875751	0.670386	1.03863	0.566717	1.74353	1.17025
0.790773	1.23691	0.540558	0.533733	1.44357	1.20992
1.20858	0.847132	0.693991	0.578711	1.75853	0.942149
1.30814	0.832733	0.679828	0.425787	1.45294	1.10231
1.10994	0.959923	0.616094	1.01949	1.56356	1.07848
0.35148	0.923926	1.30814	0.209895	1.34046	0.953078
1.04387	1.13271	1.10994	0.932534	0.455568	0.510398
1.18657	0.938325	0.35148	0.584708	1.1994	0.946807
0.851932	1.2023	1.04387	0.439669	1.64018	0.500366
1.02472	0.981522	1.18657	0.158678	1.6012	0.892883
1.47828	0.854455	0.83896	0.171901	1.38231	1.02832
0.842333	1.02712	0.854455	0.138843	0.98051	0.531717
0.739141	1.73547	0.912009	0.218182	0.524738	1.07589
0.818334	1.31046	0.723852	0.195041	1.17541	1.15562
1.2623		0.420587	0.320661	0.284858	0.784669
0.928726			0.198347	0.827586	0.604391
0.669546			0.191736	0.758621	1.08629
1.38469			0.413223	1.25637	1.02388
0.284867			0.191736	0.557721	0.701464
2.08012				0.653673	0.800848
0.839763				1.33133	0.859784
1.25223				0.242879
0.543027				1.12144
0.958005				0.770248
0.935508				0.528926
1.19423				0.456198
0.733033				1.06446
1.17923				1.23306
1.13643				0.687603
0.641679				1.10083
0.545727				1.49752
0.17991				0.426446
0.452774				1.24297
1.23838				0.816529
1.07046				1.53747
1.50525				1.18508
0.455772				1.36566
1.94903				1.02456
1.34333				1.31926
1.48126				1.12363
1.39504				1.31926
1.19339				0.941791
0.426446				1.14369
1.00496				1.06469
1.00165				1.17504
1.05124				1.7795
1.09091
0.836364
0.441425
1.1625
0.599436
0.677187
1.22521
0.917964
1.20138
1.20263
1.05215
1.28791
0.939283
1.29293
0.761556
0.922188
1.10015
1.17758
1.31741
0.721109
0.900941
0.675152
0.719425
1.02269
1.33702
0.909795
1.29275
1.14223
