# Supplementary figures and images for: Gain-of-function mutations in the UNC-2/CaV2α channel lead to excitation-dominant synaptic transmission in Caenorhabditis elegans
Source: eLife journal article supplement (doi:10.7554/elife.45905), 2019-07-31

wild type

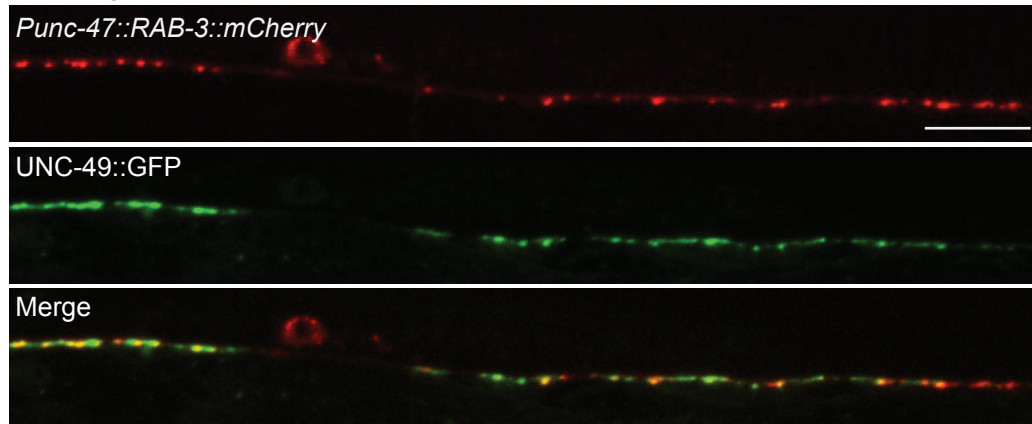

*unc-2(zf35gf)*

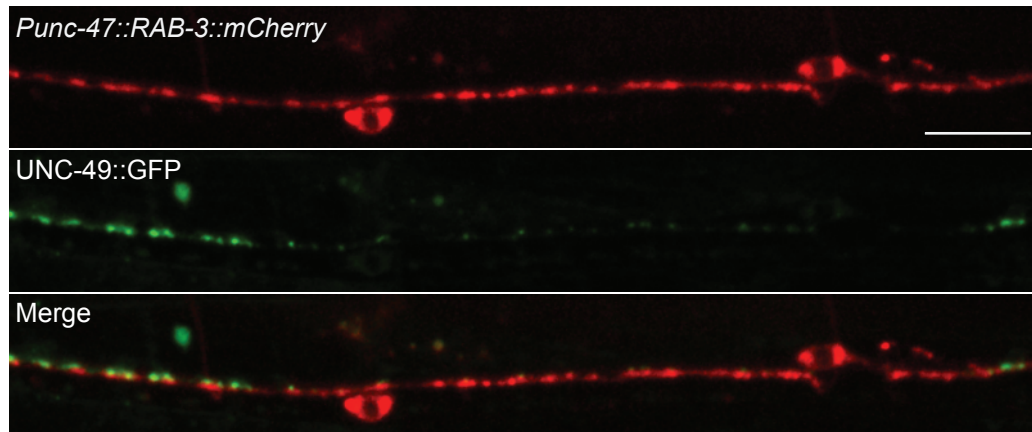

Figure 6-figure supplement 3

Supplement: supp [file elife-45905-supp-v1.zip]

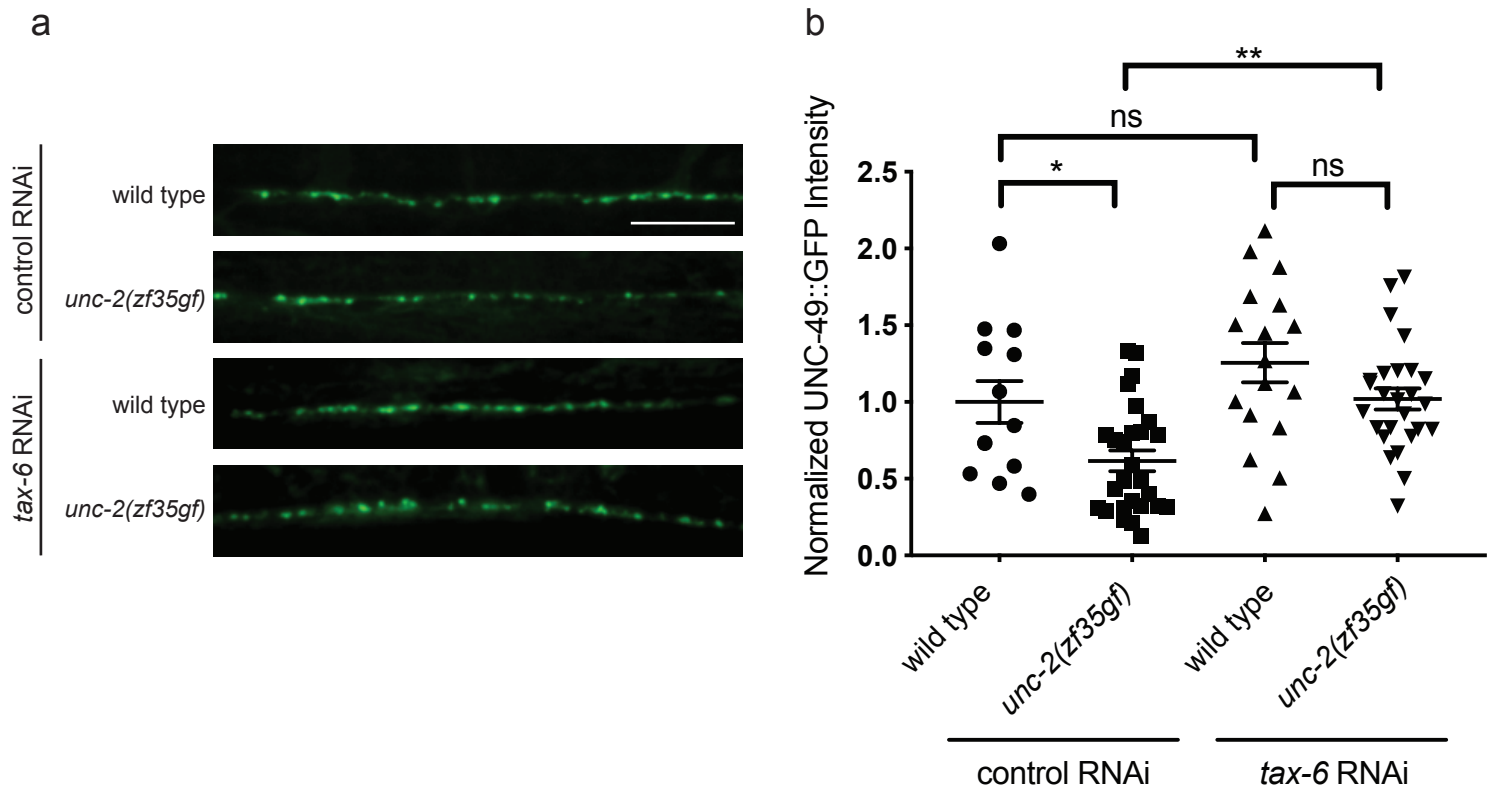

Figure 7-figure supplement 3

Supplement: supp [file elife-45905-supp-v1.zip]

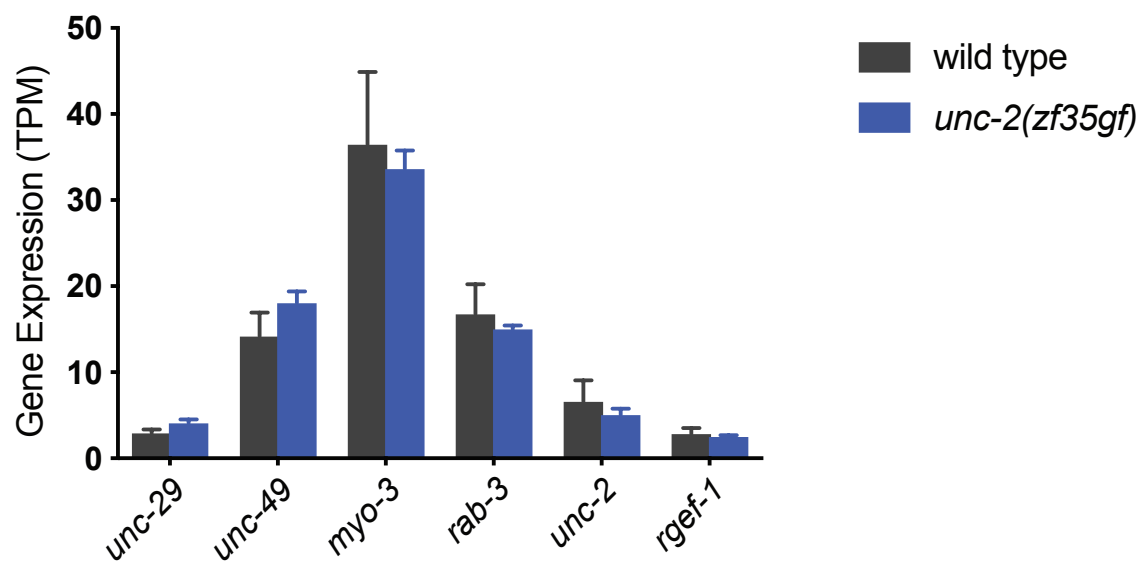

Figure 6-figure supplement 4

Supplement: supp [file elife-45905-supp-v1.zip]

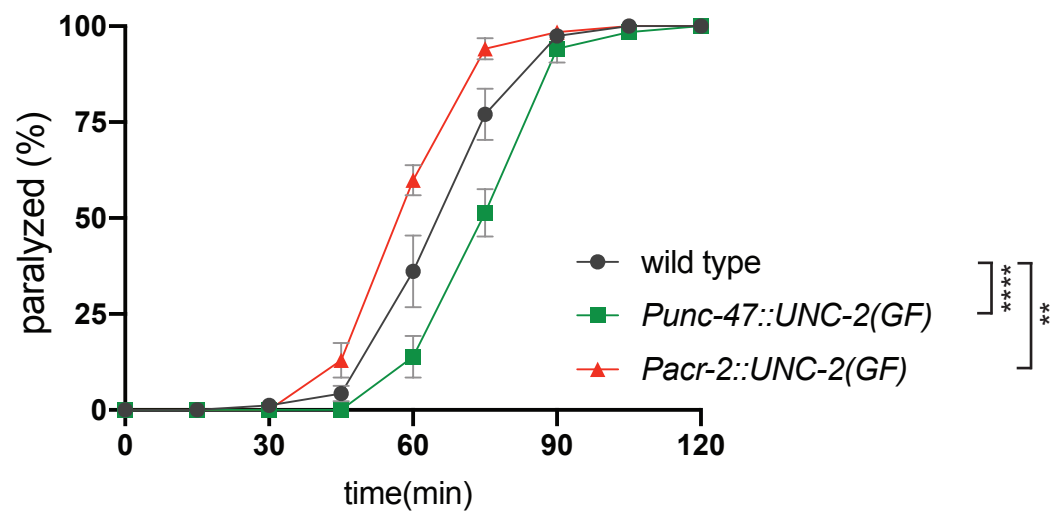

Figure 7-figure supplement 2

Supplement: supp [file elife-45905-supp-v1.zip]

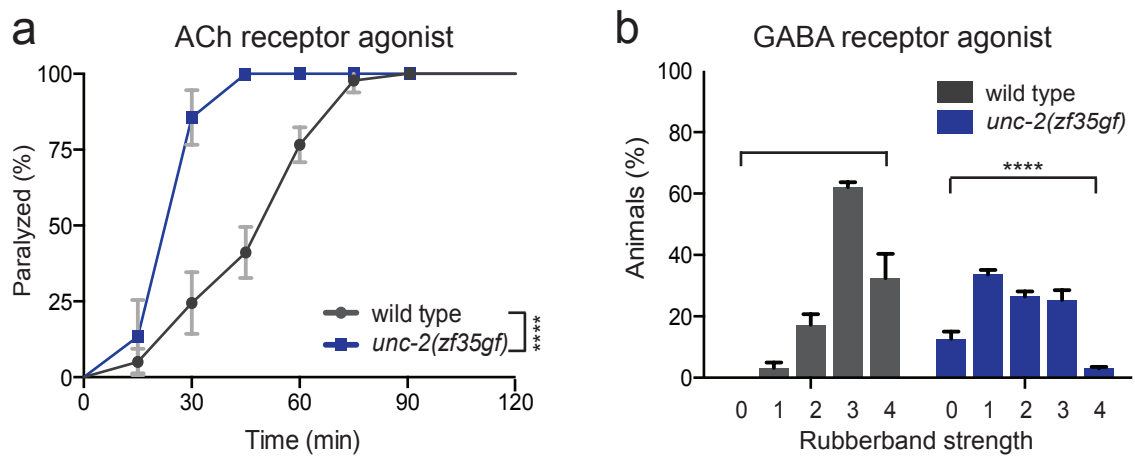

Figure 6-figure supplement 1

Supplement: supp [file elife-45905-supp-v1.zip]

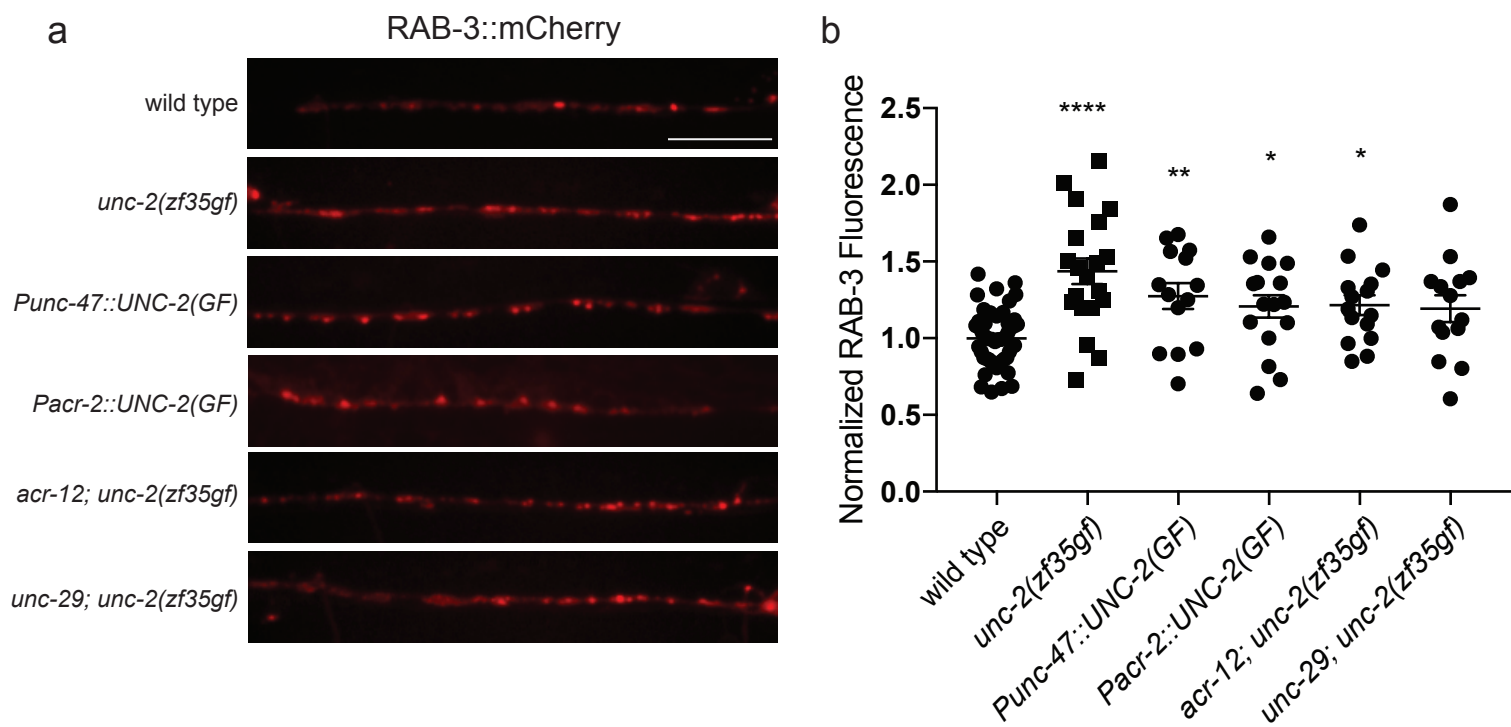

Figure 7-figure supplement 1

Supplement: supp [file elife-45905-supp-v1.zip]

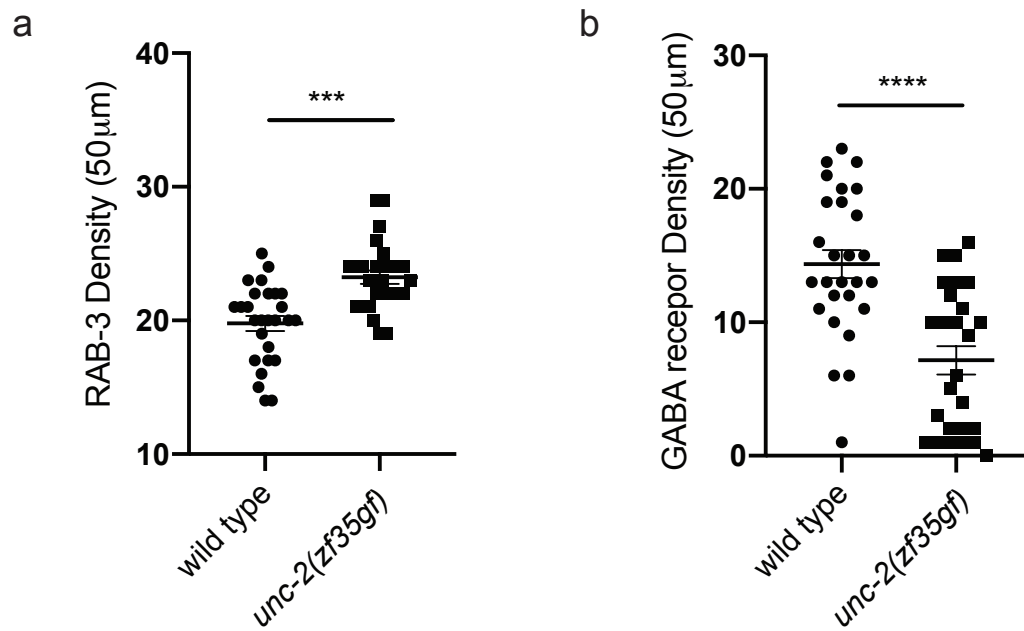

Figure 6-figure supplement 2

Supplement: supp [file elife-45905-supp-v1.zip]
